# Supplementary material for: Derivatization of (quinolin-8-yl)phosphinimidic amides via ortho-lithiation revisited
Source: Royal Society of Chemistry journal article supplement (doi:10.1039/c5dt01392e), 2015-01-01
Supplement: c5dt01392e1.pdf [file c5dt01392e1.pdf]

## Supporting Information

### Derivatization of (quinolin-8-yl)phosphinimidic amides via ortho-lithiation revisited†

Nerea Fernández Sáez, Jesús García López, María José Iglesias and Fernando López Ortiz\*

*<sup>a</sup>Área de Química Orgánica, Universidad de Almería, Carretera de Sacramento s/n, 04120, Almería, Spain. E-mail: [flortiz@ual.es](mailto:flortiz@ual.es)*

#### Contents

|                                                                                                                                                                                                                    |     |
|--------------------------------------------------------------------------------------------------------------------------------------------------------------------------------------------------------------------|-----|
| <b>Figure S1.</b> <sup>1</sup> H NMR spectra of phosphinimidic amide <b>5</b> in THF- <i>d</i> <sub>8</sub> . .....                                                                                                | S3  |
| <b>Figure S2.</b> <sup>31</sup> P{ <sup>1</sup> H} NMR spectrum of phosphinimidic amide <b>5</b> in THF- <i>d</i> <sub>8</sub> .....                                                                               | S3  |
| <b>Figure S3.</b> <sup>13</sup> C{ <sup>1</sup> H} and dept135 NMR spectra of phosphinimidic amide <b>5</b> in THF- <i>d</i> <sub>8</sub> .....                                                                    | S4  |
| <b>Figure S4.</b> <sup>1</sup> H NMR spectrum of a 75 mM solution of lithium complex <b>9</b><br>in THF- <i>d</i> <sub>8</sub> measured at -40 °C. ....                                                            | S5  |
| <b>Figure S5.</b> <sup>31</sup> P{ <sup>1</sup> H} NMR spectrum of a 75 mM solution of<br>lithium complex <b>9</b> in THF- <i>d</i> <sub>8</sub> measured at -40 °C. ....                                          | S5  |
| <b>Figure S6.</b> <sup>13</sup> C{ <sup>1</sup> H} and dept135 NMR spectra of<br>a 0.42 mM solution of lithium complex <b>9</b> in THF- <i>d</i> <sub>8</sub> measured at -40 °C. ....                             | S6  |
| <b>Figure S7.</b> <sup>7</sup> Li{ <sup>1</sup> H} NMR spectrum of a 0.42 M solution of<br>lithium complex <b>9</b> in THF- <i>d</i> <sub>8</sub> measured at -40 °C. ....                                         | S6  |
| <b>Figure S8.</b> COSY45 NMR spectrum of a 0.42 M solution of<br>lithium complex <b>9</b> in THF- <i>d</i> <sub>8</sub> measured at -40 °C. ....                                                                   | S7  |
| <b>Figure S9.</b> <sup>1</sup> H, <sup>13</sup> C gHMQC spectrum of a 0.42 M solution of<br>lithium complex <b>9</b> in THF- <i>d</i> <sub>8</sub> measured at -40 °C. ....                                        | S7  |
| <b>Figure S10.</b> <sup>1</sup> H, <sup>13</sup> C gHMBC spectrum of a 75 mM solution of<br>lithium complex <b>9</b> in THF- <i>d</i> <sub>8</sub> measured at -40 °C. ....                                        | S8  |
| <b>Figure S11.</b> <sup>31</sup> P, <sup>15</sup> N{ <sup>1</sup> H} HMQC spectra of<br>a 0.42 M solution in THF- <i>d</i> <sub>8</sub> of compound <b>5</b> and lithium complex <b>9</b> . ....                   | S8  |
| <b>Figure S12.</b> Variable temperature <sup>31</sup> P{ <sup>1</sup> H}- and <sup>7</sup> Li{ <sup>1</sup> H} NMR spectra of<br>a 75 mM solution of lithium complex <b>9</b> in THF- <i>d</i> <sub>8</sub> . .... | S9  |
| <b>Figure S13.</b> Effect of temperature and time aging of monoanion <b>9</b><br>(0.42 M solution in THF- <i>d</i> <sub>8</sub> ) determined through <sup>31</sup> P NMR spectroscopy. ....                        | S9  |
| <b>Figure S14.</b> <sup>1</sup> H NMR spectrum of phosphinimidic amide <b>13</b> in CDCl <sub>3</sub> . ....                                                                                                       | S10 |

|                                                                                                                                                                                                                                                                                                     |     |
|-----------------------------------------------------------------------------------------------------------------------------------------------------------------------------------------------------------------------------------------------------------------------------------------------------|-----|
| <b>Figure S15.</b> $^{31}\text{P}\{^1\text{H}\}$ NMR spectrum of phosphinimidic amide <b>13</b> in $\text{CDCl}_3$ .....                                                                                                                                                                            | S10 |
| <b>Figure S16.</b> $^{13}\text{C}\{^1\text{H}\}$ and dept135 NMR spectra of phosphinimidic amide <b>13</b> in $\text{CDCl}_3$ . .....                                                                                                                                                               | S11 |
| <b>Figure S17.</b> Expansions of $^{13}\text{C}$ NMR spectra of phosphinimidic amide <b>13</b> in $\text{CDCl}_3$ : a) $^{13}\text{C}\{^1\text{H}\}$ ; b) $^{13}\text{C}\{^{31}\text{P}, ^1\text{H}\}$ ; $^{13}\text{C}\{^1\text{H}\}$ jmod; $^{13}\text{C}\{^{31}\text{P}, ^1\text{H}\}$ jmod..... | S11 |
| <b>Figure S18.</b> $^1\text{H}$ NMR spectrum of phosphinimidic amide <b>14</b> in $\text{CDCl}_3$ .....                                                                                                                                                                                             | S12 |
| <b>Figure S19.</b> $^{31}\text{P}\{^1\text{H}\}$ NMR spectrum of phosphinimidic amide <b>14</b> in $\text{CDCl}_3$ .....                                                                                                                                                                            | S12 |
| <b>Figure S20.</b> $^{13}\text{C}\{^1\text{H}\}$ and dept135 NMR spectra of phosphinimidic amide <b>14</b> in $\text{CDCl}_3$ . .....                                                                                                                                                               | S13 |
| <b>Figure S21.</b> $^1\text{H}$ NMR spectrum of phosphinimidic amide <b>15</b> in $\text{CDCl}_3$ .....                                                                                                                                                                                             | S13 |
| <b>Figure S22.</b> $^{31}\text{P}\{^1\text{H}\}$ NMR spectrum of phosphinimidic amide <b>15</b> in $\text{CDCl}_3$ .....                                                                                                                                                                            | S14 |
| <b>Figure S23.</b> $^{13}\text{C}\{^1\text{H}\}$ and dept135 NMR spectra of phosphinimidic amide <b>15</b> in $\text{CDCl}_3$ . .....                                                                                                                                                               | S14 |
| <b>Figure S24.</b> $^1\text{H}$ NMR spectrum of phosphinimidic amide <b>16</b> in $\text{CDCl}_3$ .....                                                                                                                                                                                             | S15 |
| <b>Figure S25.</b> $^{31}\text{P}\{^1\text{H}\}$ NMR spectrum of phosphinimidic amide <b>16</b> in $\text{CDCl}_3$ .....                                                                                                                                                                            | S15 |
| <b>Figure S26.</b> $^{13}\text{C}\{^1\text{H}\}$ and dept135 NMR spectra of phosphinimidic amide <b>16</b> in $\text{CDCl}_3$ . .....                                                                                                                                                               | S16 |
| <b>Figure S27.</b> $^1\text{H}$ NMR spectrum of phosphinimidic amide <b>17</b> in $\text{CDCl}_3$ .....                                                                                                                                                                                             | S16 |
| <b>Figure S28.</b> $^{31}\text{P}\{^1\text{H}\}$ NMR spectrum of phosphinimidic amide <b>17</b> in $\text{CDCl}_3$ .....                                                                                                                                                                            | S17 |
| <b>Figure S29.</b> $^{13}\text{C}\{^1\text{H}\}$ and dept135 NMR spectra of phosphinimidic amide <b>17</b> in $\text{CDCl}_3$ . .....                                                                                                                                                               | S17 |
| <b>Figure S30.</b> $^1\text{H}$ NMR spectrum of phosphinimidic amide <b>18</b> in $\text{CDCl}_3$ .....                                                                                                                                                                                             | S18 |
| <b>Figure S31.</b> $^{31}\text{P}\{^1\text{H}\}$ NMR spectrum of phosphinimidic amide <b>18</b> in $\text{CDCl}_3$ .....                                                                                                                                                                            | S18 |
| <b>Figure S32.</b> $^{13}\text{C}\{^1\text{H}\}$ and dept135 NMR spectra of phosphinimidic amide <b>18</b> in $\text{CDCl}_3$ . .....                                                                                                                                                               | S19 |
| <b>Figure S33.</b> Computed reaction pathway for the $\text{NH}$ vs. $\text{CH}_{\text{ortho}}$ deprotonation of <b>5</b> .....                                                                                                                                                                     | S20 |
| <b>Figure S34.</b> Computed structures of monomers including selected thermodynamic and geometric parameters.....                                                                                                                                                                                   | S21 |
| <b>Figure S35.</b> Computed structures of dimers including selected thermodynamic and geometric parameters.....                                                                                                                                                                                     | S22 |
| <b>Table S1.</b> The Cartesian coordinates ( $\text{\AA}$ ), SCF energies, enthalpies at 233K, and Gibbs free energies at 233K for the optimized structures .....                                                                                                                                   | S23 |

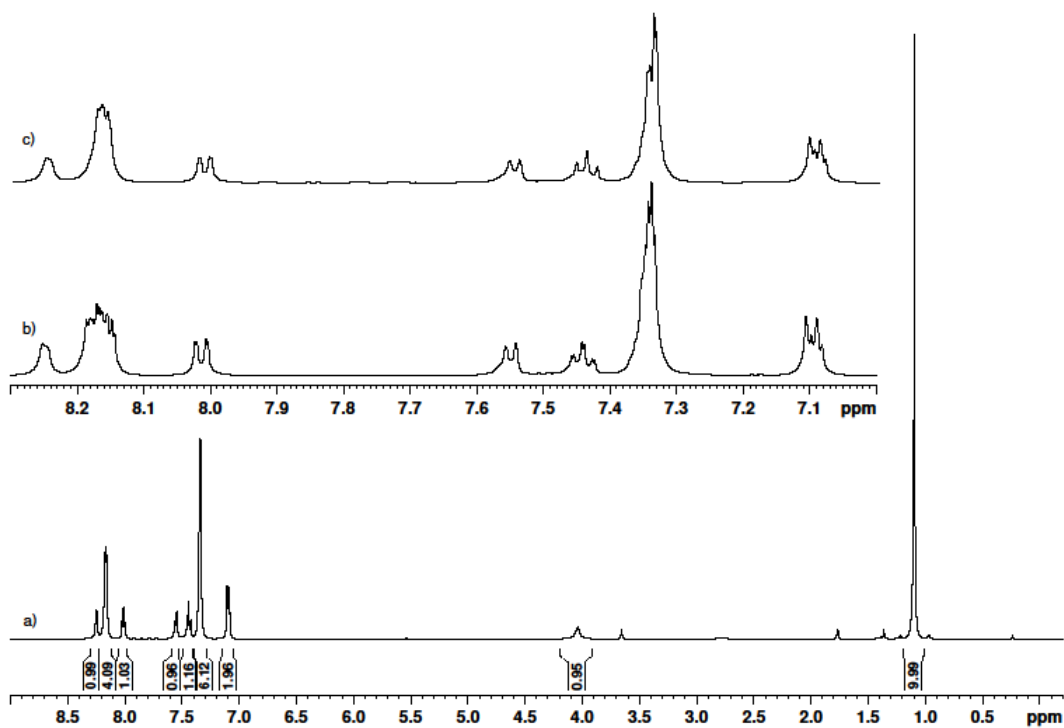

**Figure S1.**  $^1\text{H}$  NMR spectra (500.13 MHz) of phosphinimidic amide **5** in  $\text{THF-}d_8$ : (a) standard; (b) expansion of (a); (c) the same as (b) including  $^{31}\text{P}$  decoupling.

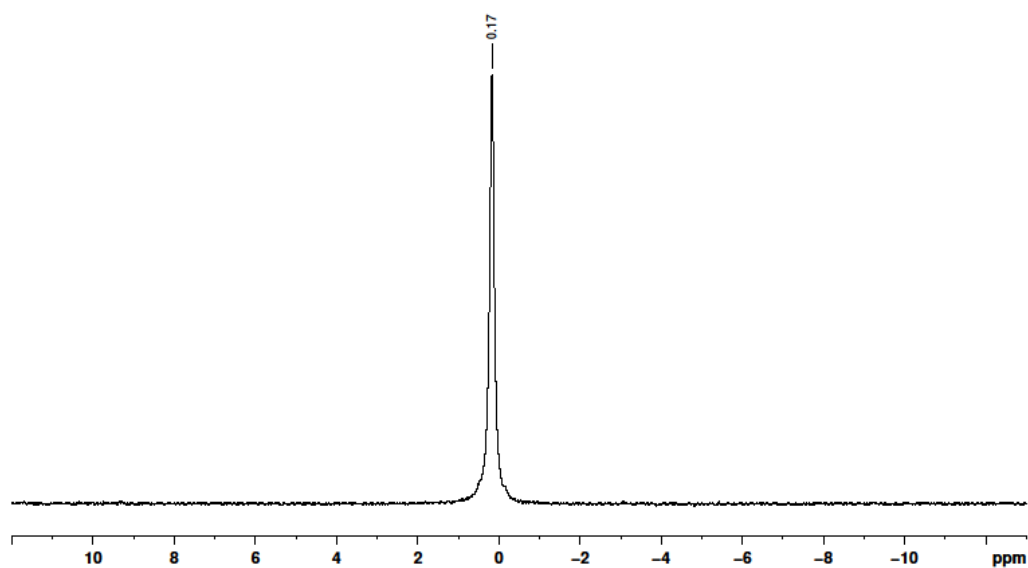

**Figure S2.**  $^{31}\text{P}\{^1\text{H}\}$  NMR spectrum (202.45 MHz) of phosphinimidic amide **5** in  $\text{THF-}d_8$ .

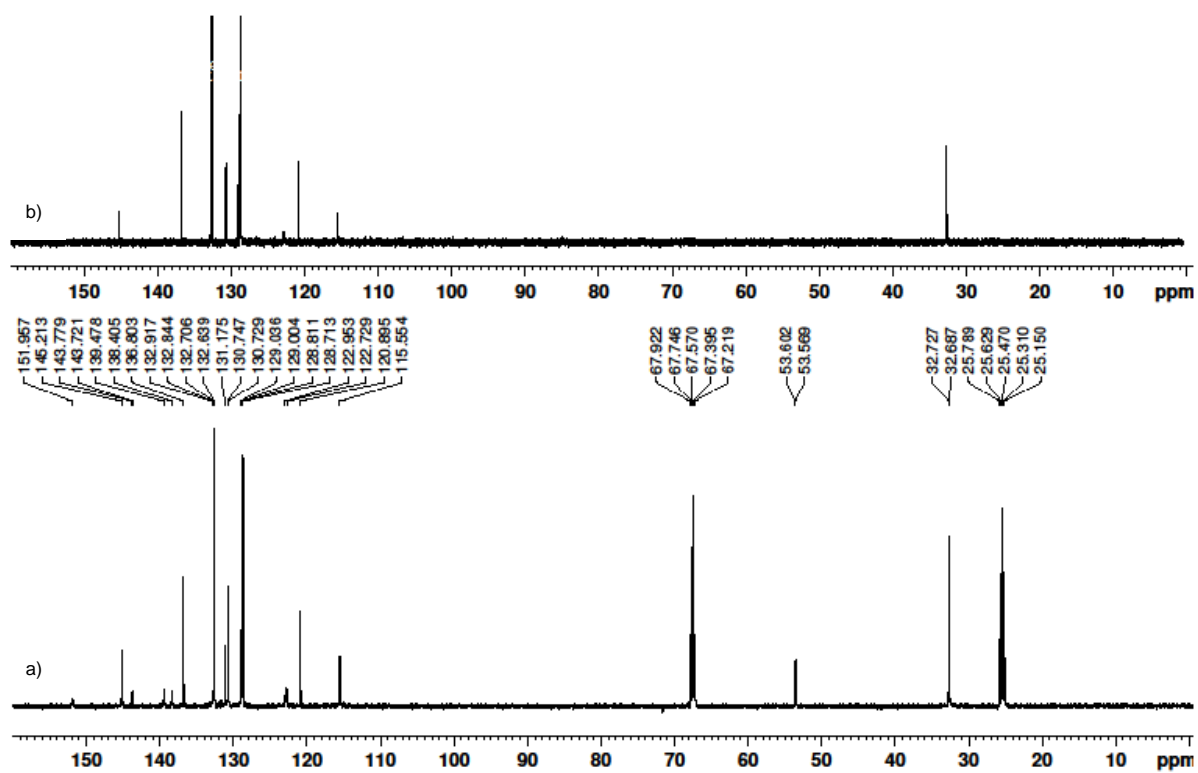

**Figure S3.**  $^{13}\text{C}\{^1\text{H}\}$  NMR spectra (125.76 MHz) of phosphinimidic amide **5** in  $\text{THF-}d_8$ , standard (a) and dept135 (b).

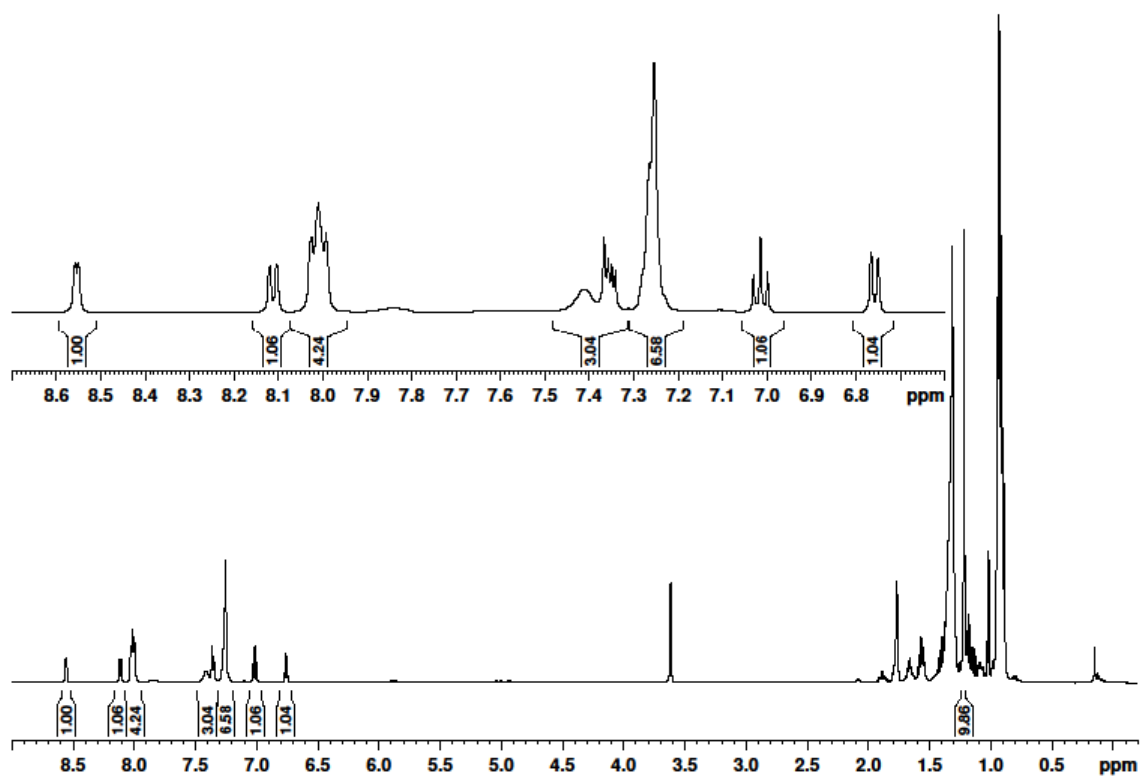

**Figure S4.**  $^1\text{H}$  NMR spectrum (500.13 MHz) of a 75 mM solution of lithium complex **9** in  $\text{THF-}d_8$  measured at  $-40^\circ\text{C}$ .

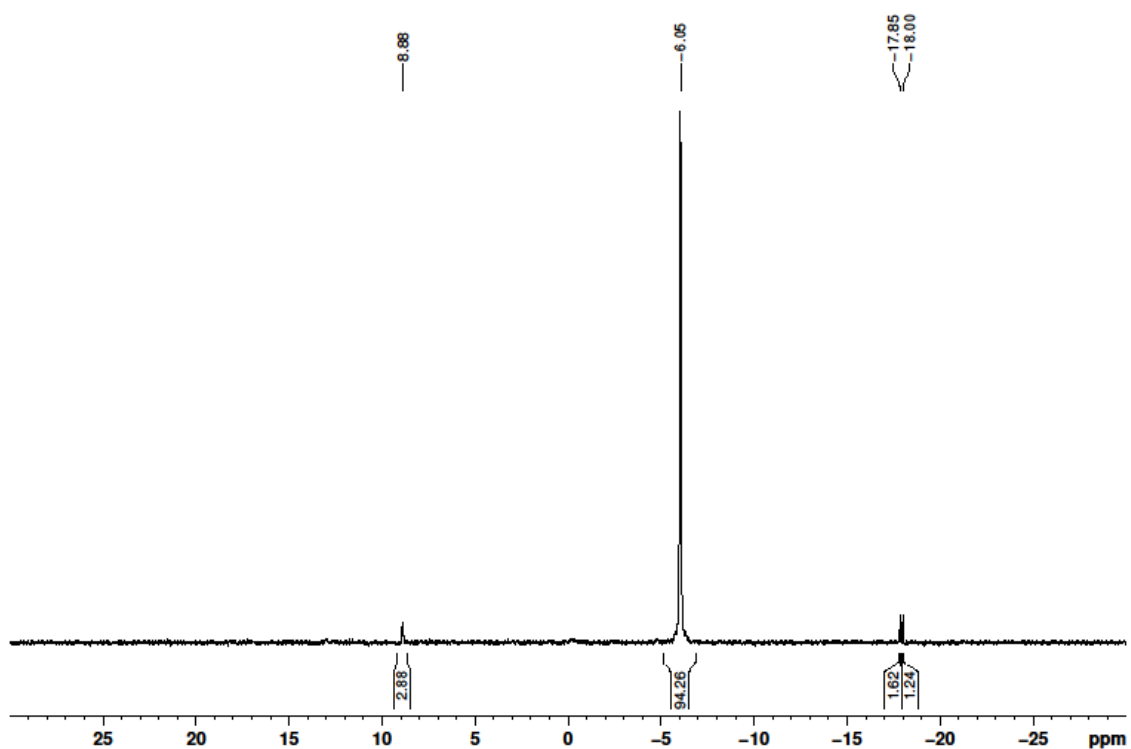

**Figure S5.**  $^{31}\text{P}\{^1\text{H}\}$  NMR spectrum (202.45 MHz) of a 75 mM solution of lithium complex **9** in  $\text{THF-}d_8$  measured at  $-40^\circ\text{C}$ .

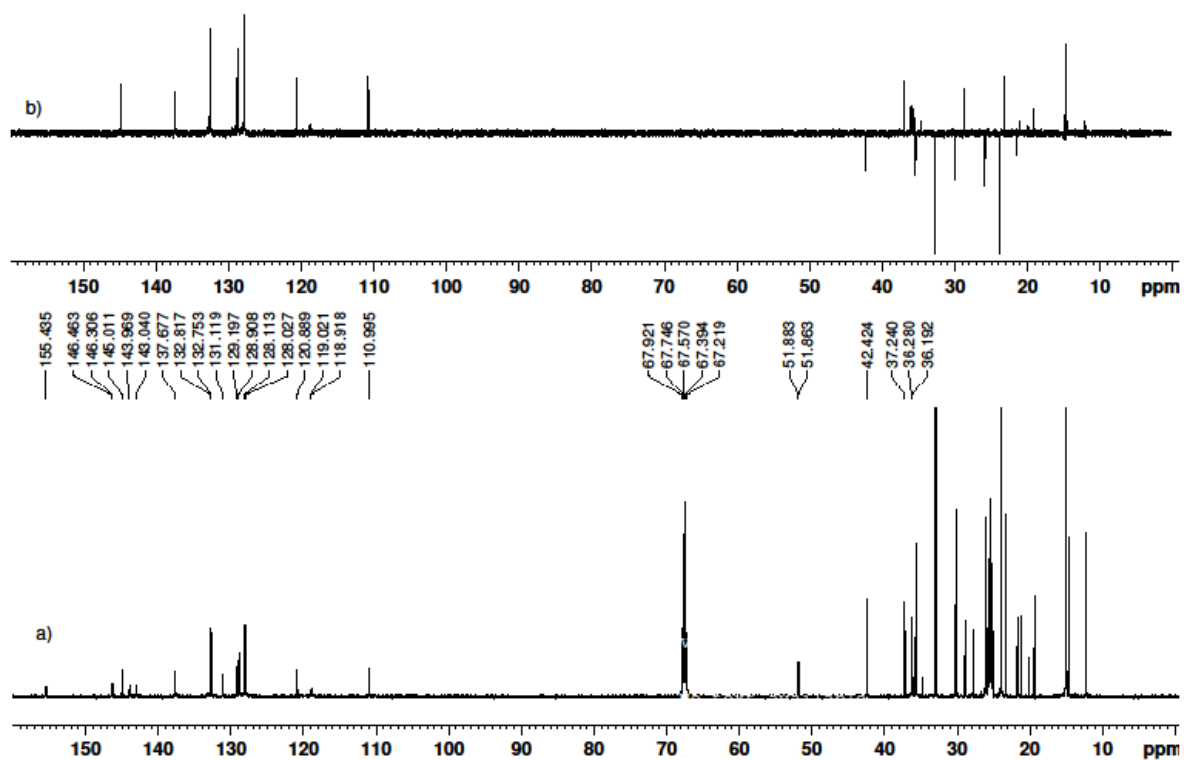

**Figure S6.**  $^{13}\text{C}\{^1\text{H}\}$  (a) and dept135 (b) NMR spectra (125.76 MHz) of a 0.42 mM solution of lithium complex **9** in  $\text{THF-}d_8$  measured at  $-40^\circ\text{C}$ .

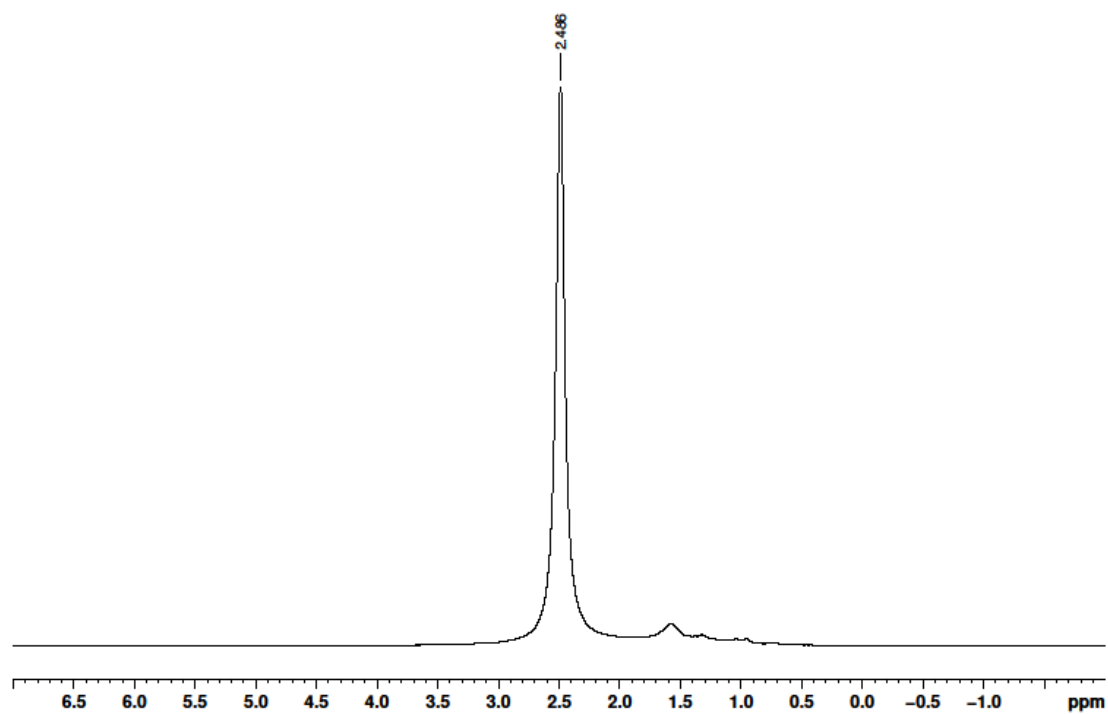

**Figure S7.**  $^7\text{Li}\{^1\text{H}\}$  NMR spectrum (194.37 MHz) of a 0.42 M solution of lithium complex **9** in  $\text{THF-}d_8$  measured at  $-40^\circ\text{C}$ .

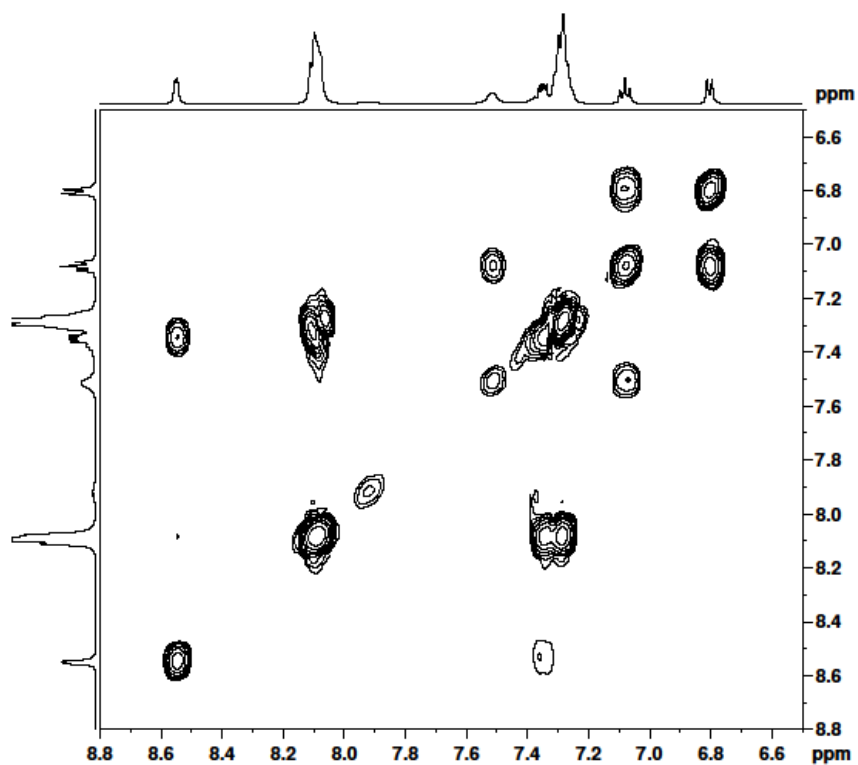

**Figure S8.** COSY45 NMR spectrum (500.13 MHz) of a 0.42 M solution of lithium complex **9** in THF- $d_8$  measured at  $-40$  °C.

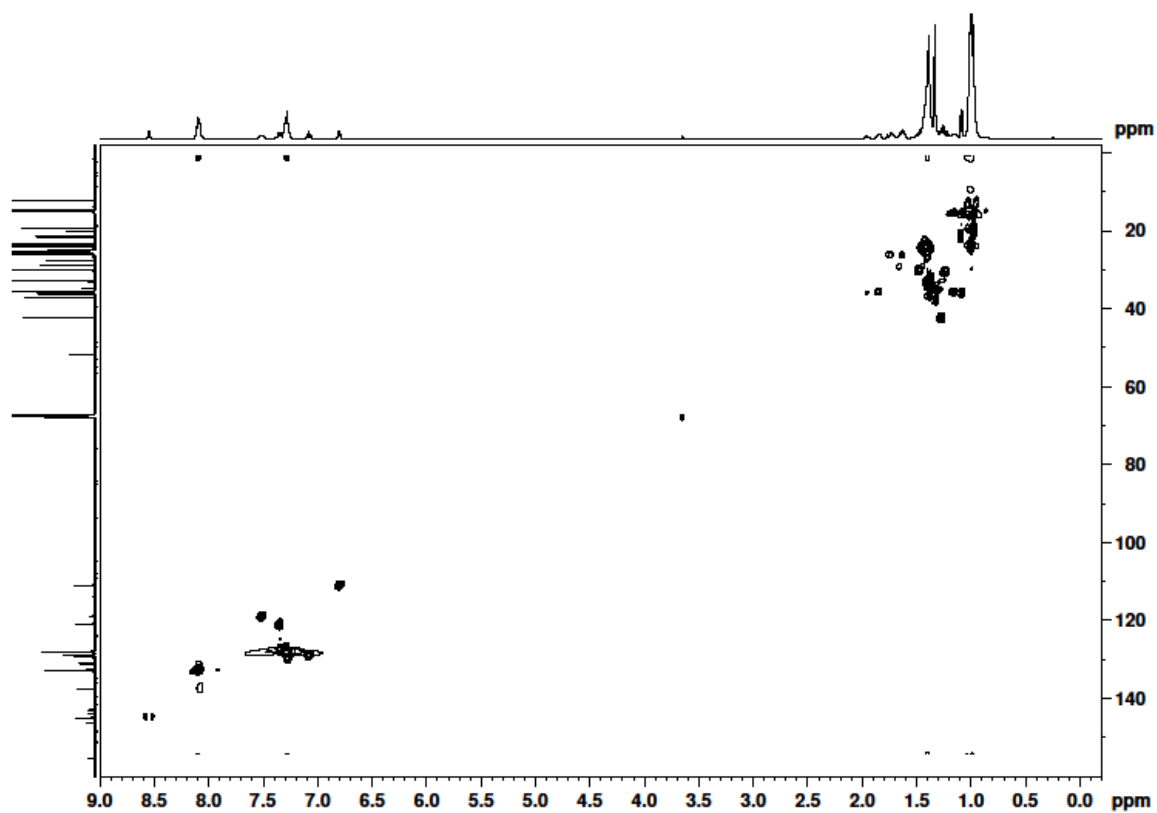

**Figure S9.**  $^1\text{H}$ ,  $^{13}\text{C}$  gHMQC spectrum (500.13 MHz) of a 0.42 M solution of lithium complex **9** in THF- $d_8$  measured at  $-40$  °C.

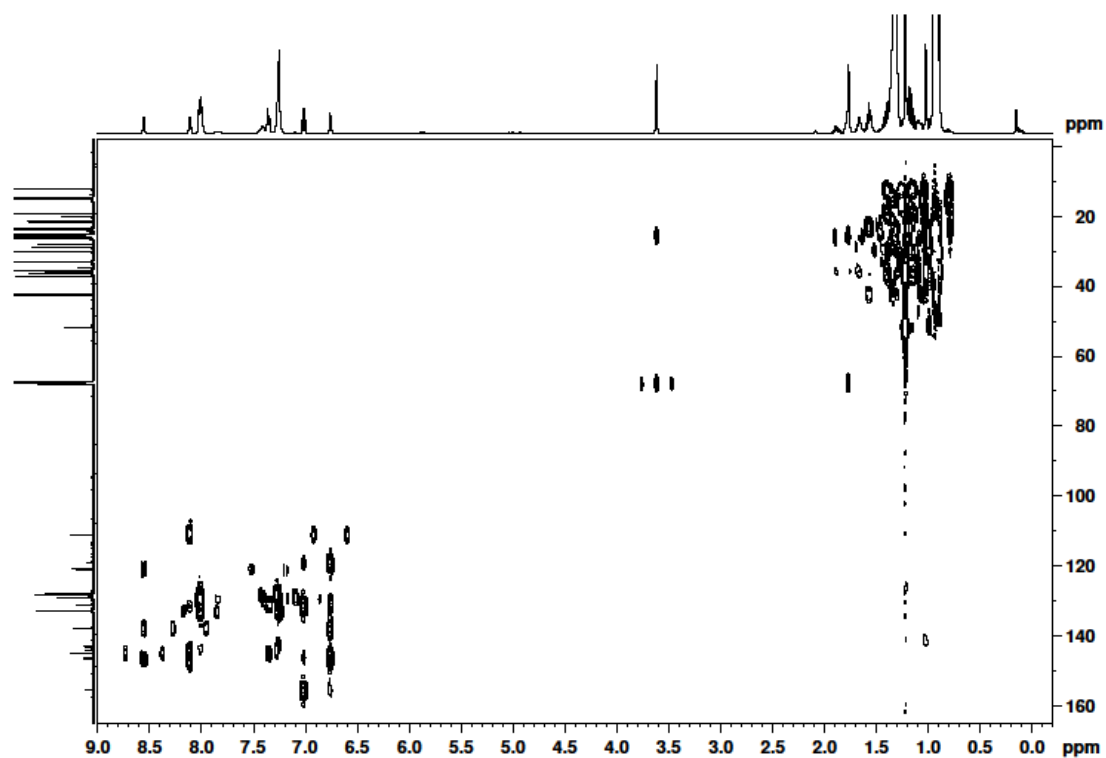

**Figure S10.**  $^1\text{H}$ ,  $^{13}\text{C}$  gHMBC spectrum (500.13 MHz) of a 75 mM solution of lithium complex **9** in THF- $d_8$  measured at  $-40^\circ\text{C}$ .

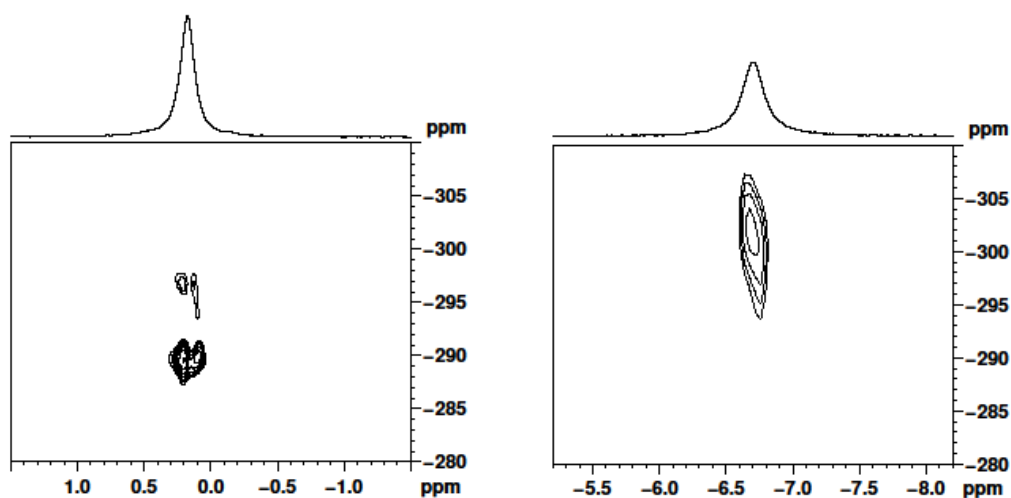

**Figure S11.**  $^{31}\text{P}$ ,  $^{15}\text{N}\{^1\text{H}\}$  HMQC spectra (202.45 MHz) of a 0.42 M solution in THF- $d_8$  of compound **5** (left) measured at  $25^\circ\text{C}$  and lithium complex **9** (right) measured at  $-40^\circ\text{C}$ . Slight differences in  $^{15}\text{N}$  chemical shifts as compared with the 75 mM sample are assigned to concentration effects.



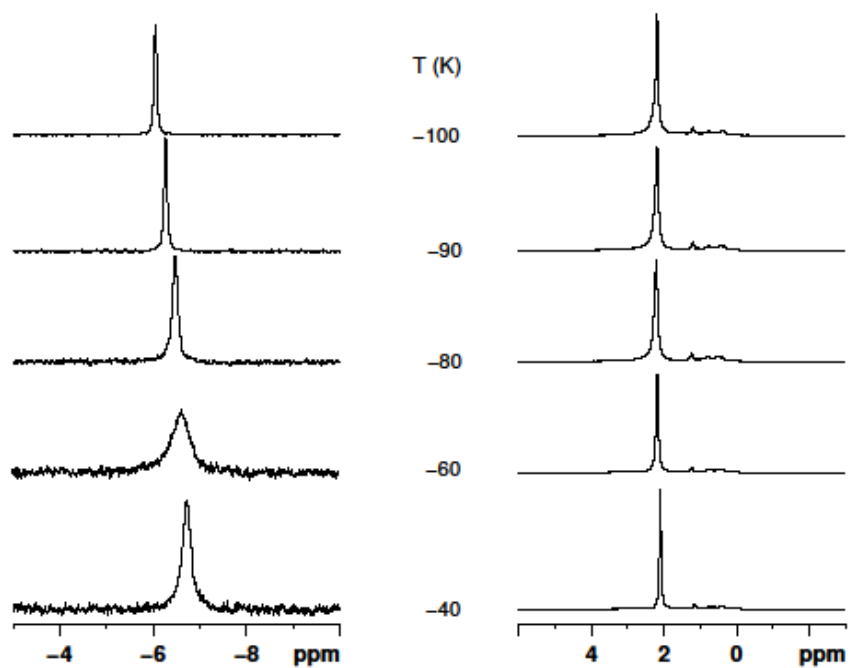

**Figure S12.** Variable temperature  $^{31}\text{P}\{^1\text{H}\}$ - (202.45 MHz) (left) and  $^7\text{Li}\{^1\text{H}\}$  (194.37 MHz) NMR spectra (right) of a 75 mM solution of lithium complex **9** in THF- $d_8$ .

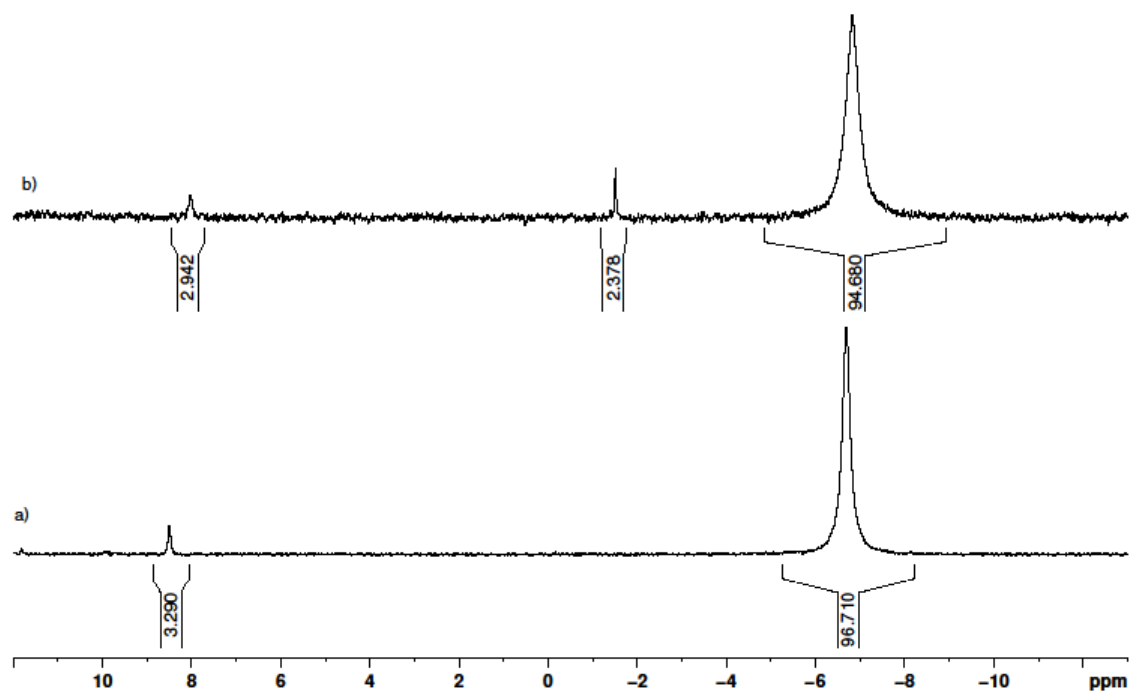

**Figure S13.** Effect of temperature and time aging of monoanion **9** (0.42 M solution in THF- $d_8$ ) determined through  $^{31}\text{P}$  NMR spectroscopy: (a) measured at  $-20\text{ }^\circ\text{C}$ , time elapsed after the preparation of the sample ca. 4 h. (b) Time elapsed after the preparation of the sample of 69 h (49 h at temperatures below  $-20\text{ }^\circ\text{C}$ , 15 h at  $4\text{ }^\circ\text{C}$  and 5 h at rt).

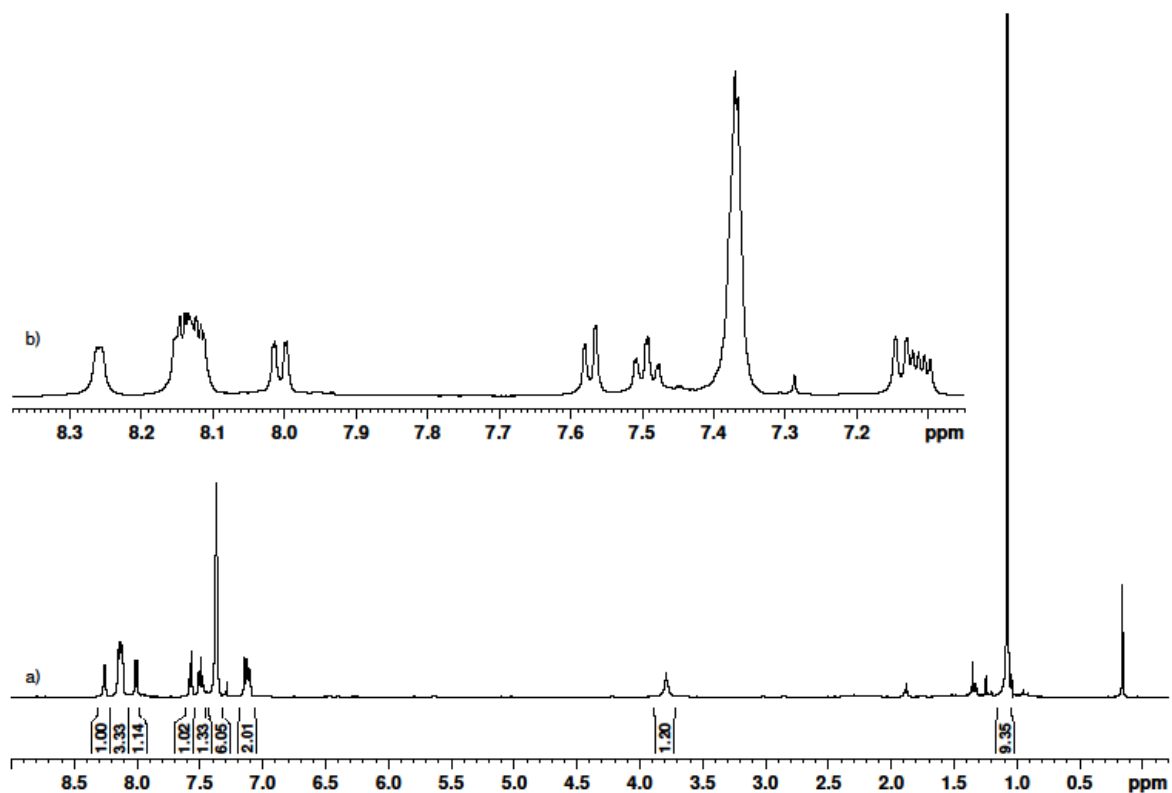

**Figure S14.**  $^1\text{H}$  NMR spectrum (500.13 MHz) of phosphinimidic amide **13** in  $\text{CDCl}_3$ .

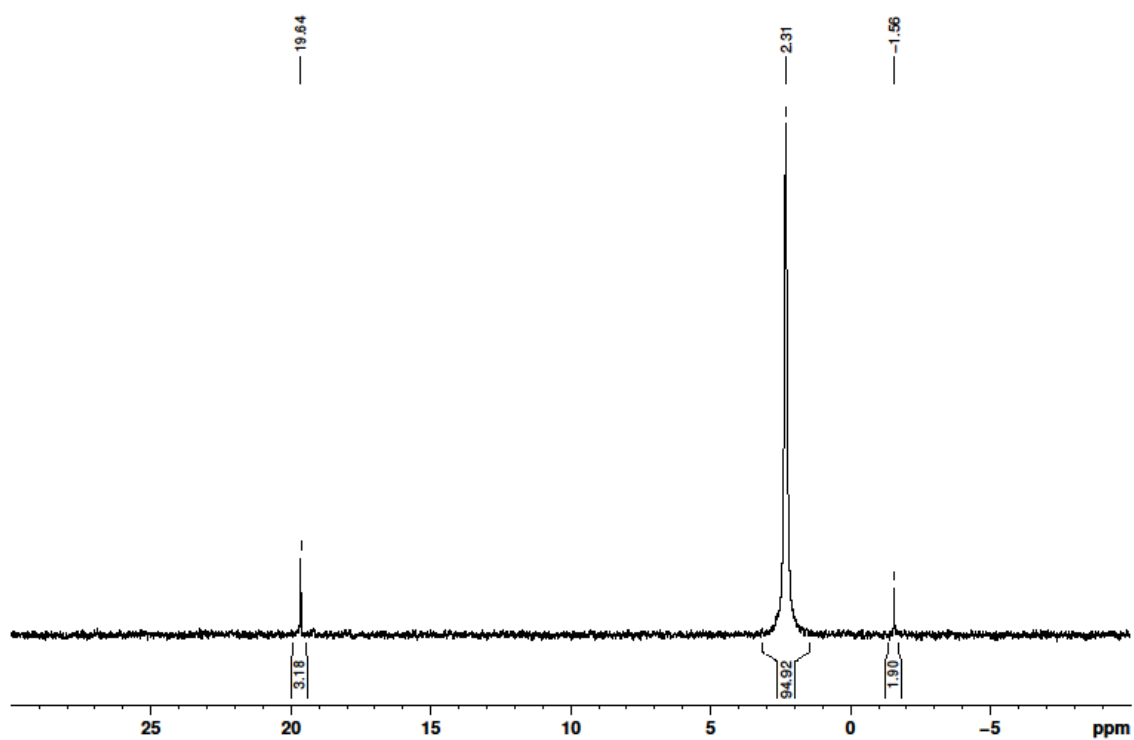

**Figure S15.**  $^{31}\text{P}\{^1\text{H}\}$  NMR spectrum (202.45 MHz) of phosphinimidic amide **13** in  $\text{CDCl}_3$ .

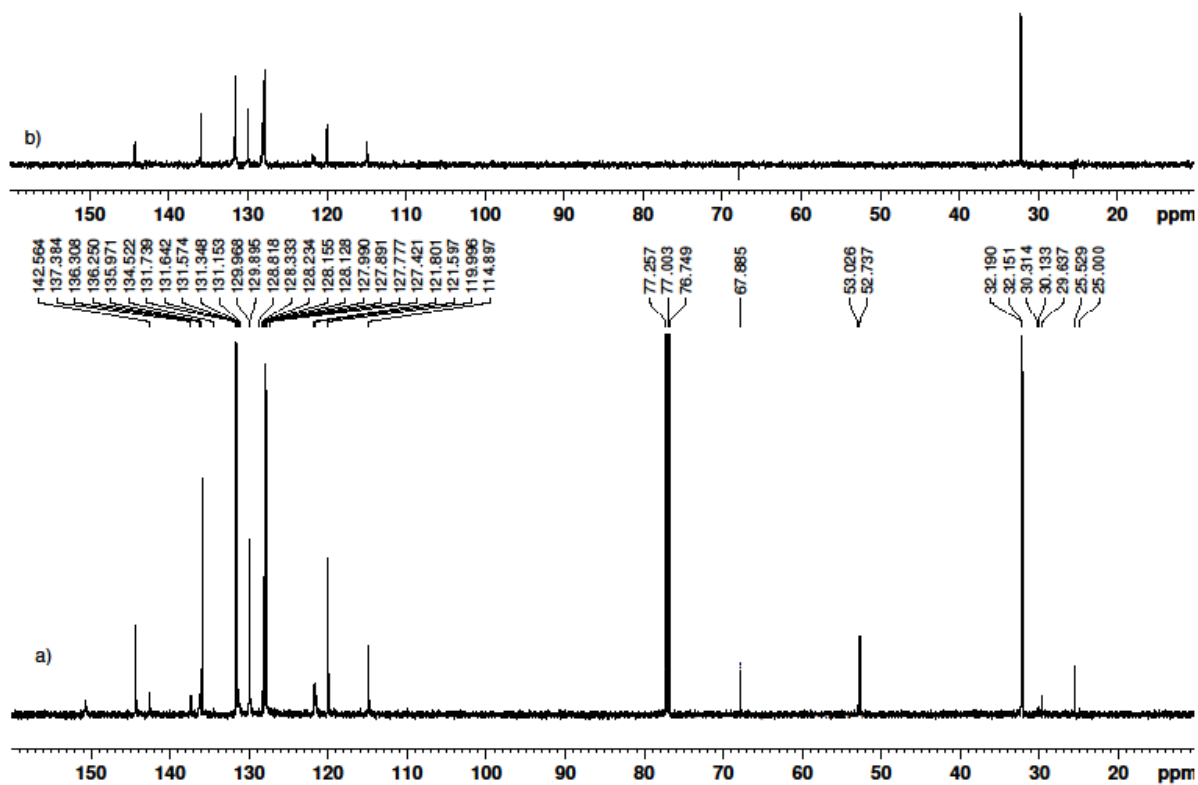

**Figure S16.**  $^{13}\text{C}\{^1\text{H}\}$  (a) and dept135 (b) NMR spectra (125.76 MHz) of phosphinimidic amide **13** in  $\text{CDCl}_3$ .

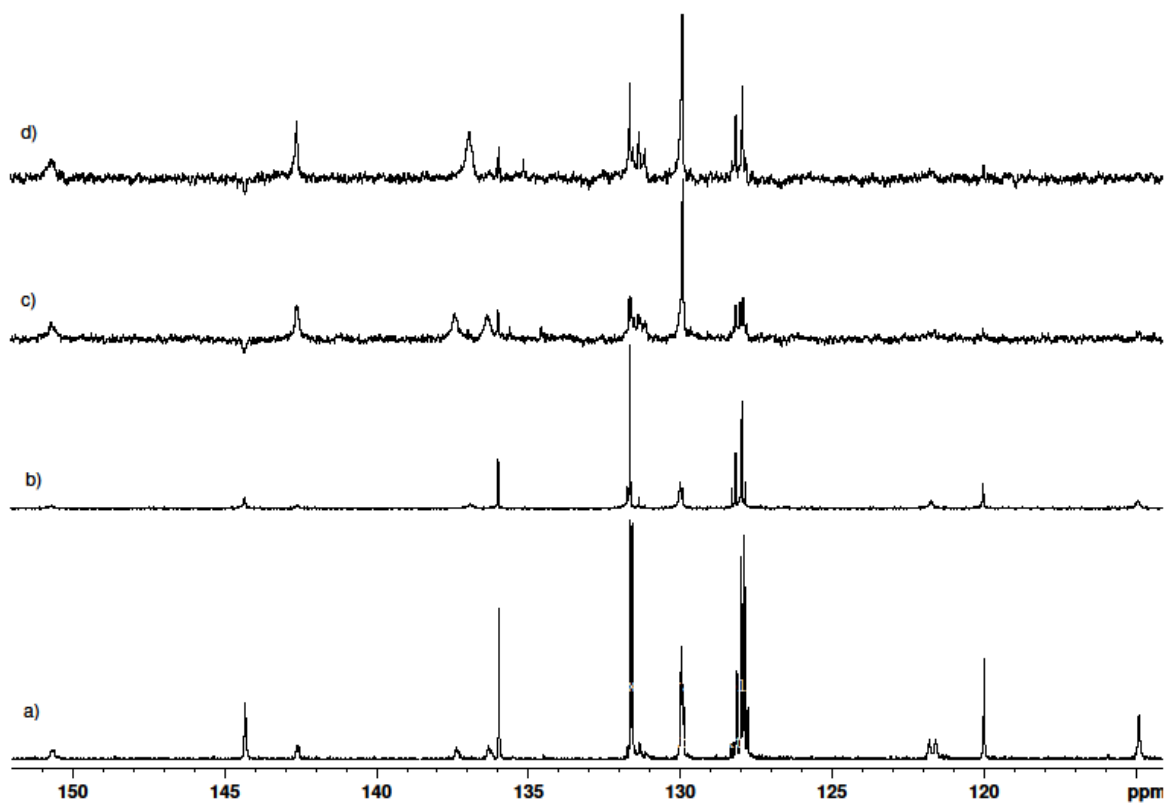

**Figure S17.** Expansions of  $^{13}\text{C}$  NMR spectra (125.76 MHz) of phosphinimidic amide **13** in  $\text{CDCl}_3$ : a)  $^{13}\text{C}\{^1\text{H}\}$ ; b)  $^{13}\text{C}\{^{31}\text{P}, ^1\text{H}\}$ ; c)  $^{13}\text{C}\{^1\text{H}\}$  jmod; d)  $^{13}\text{C}\{^{31}\text{P}, ^1\text{H}\}$  jmod.

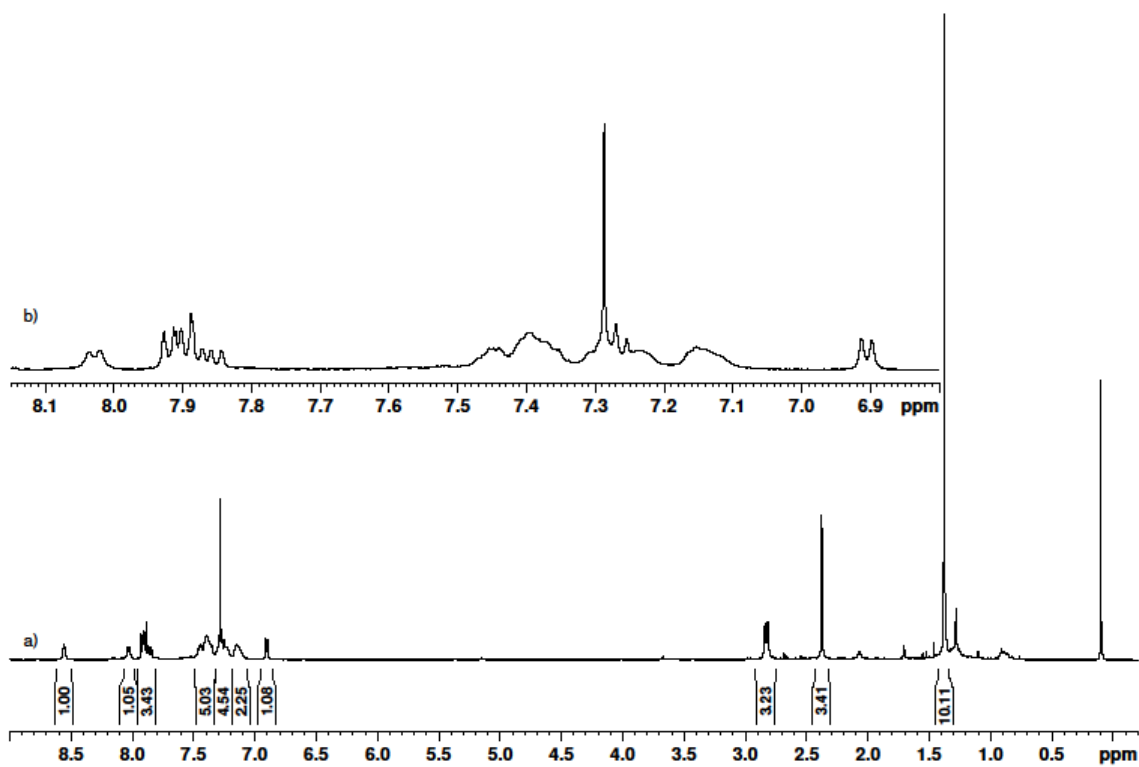

**Figure S18.**  $^1\text{H}$  NMR spectrum (500.13 MHz) of phosphinimidic amide **14** in  $\text{CDCl}_3$ .

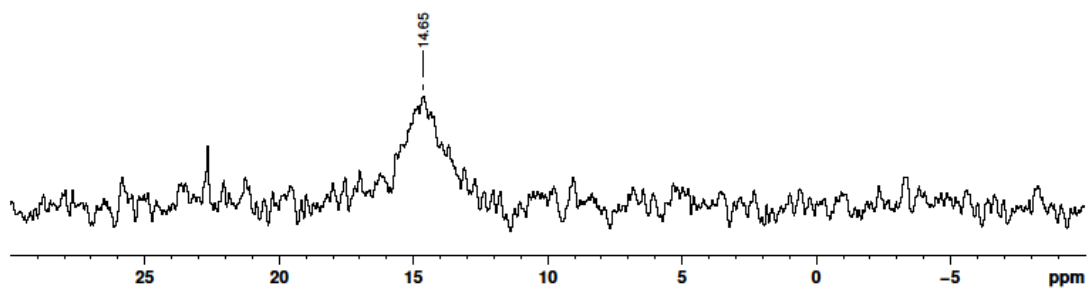

**Figure S19.**  $^{31}\text{P}\{^1\text{H}\}$  NMR spectrum (202.45 MHz) of phosphinimidic amide **14** in  $\text{CDCl}_3$ .

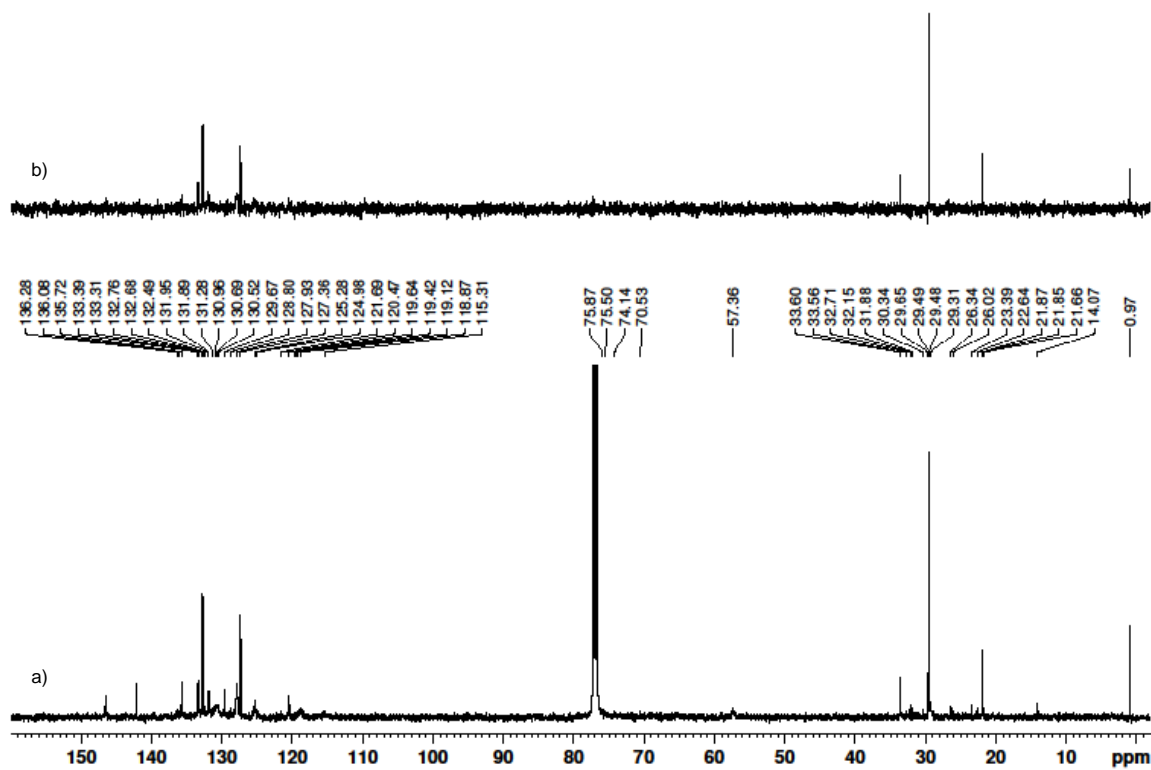

**Figure S20.**  $^{13}\text{C}\{^1\text{H}\}$  (a) and dept135 (b) NMR spectra (125.76 MHz) of phosphinimidic amide **14** in  $\text{CDCl}_3$ .

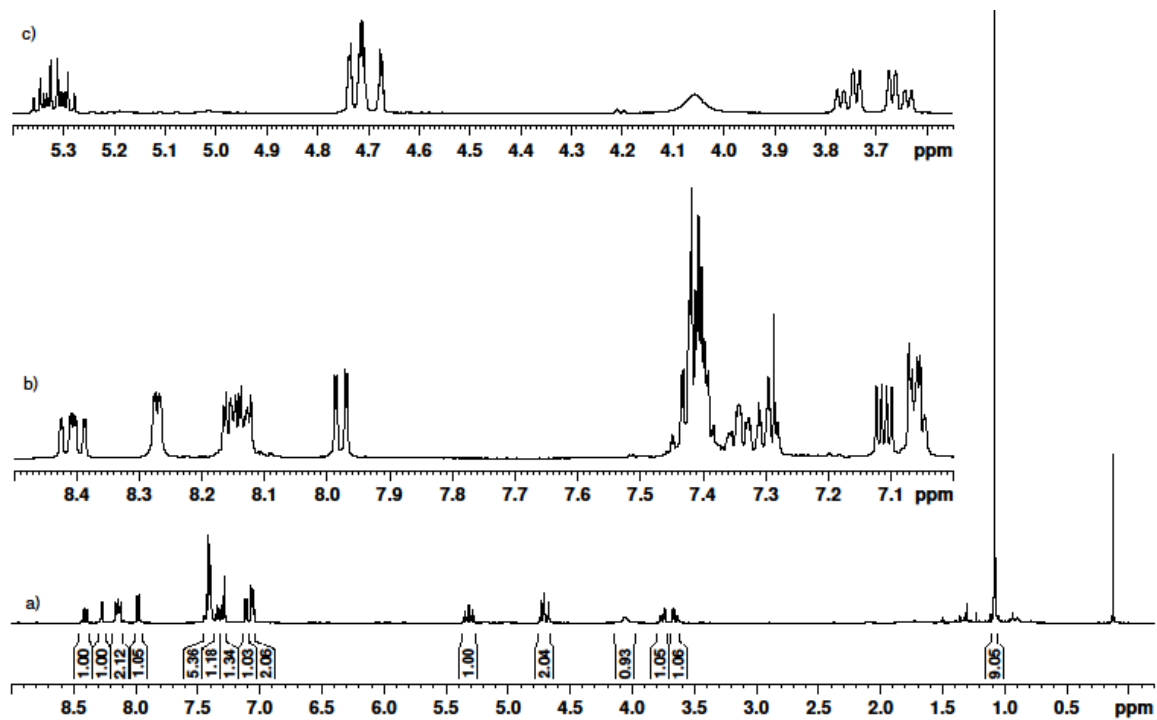

**Figure S21.**  $^1\text{H}$  NMR spectrum (500.13 MHz) of phosphinimidic amide **15** in  $\text{CDCl}_3$ .

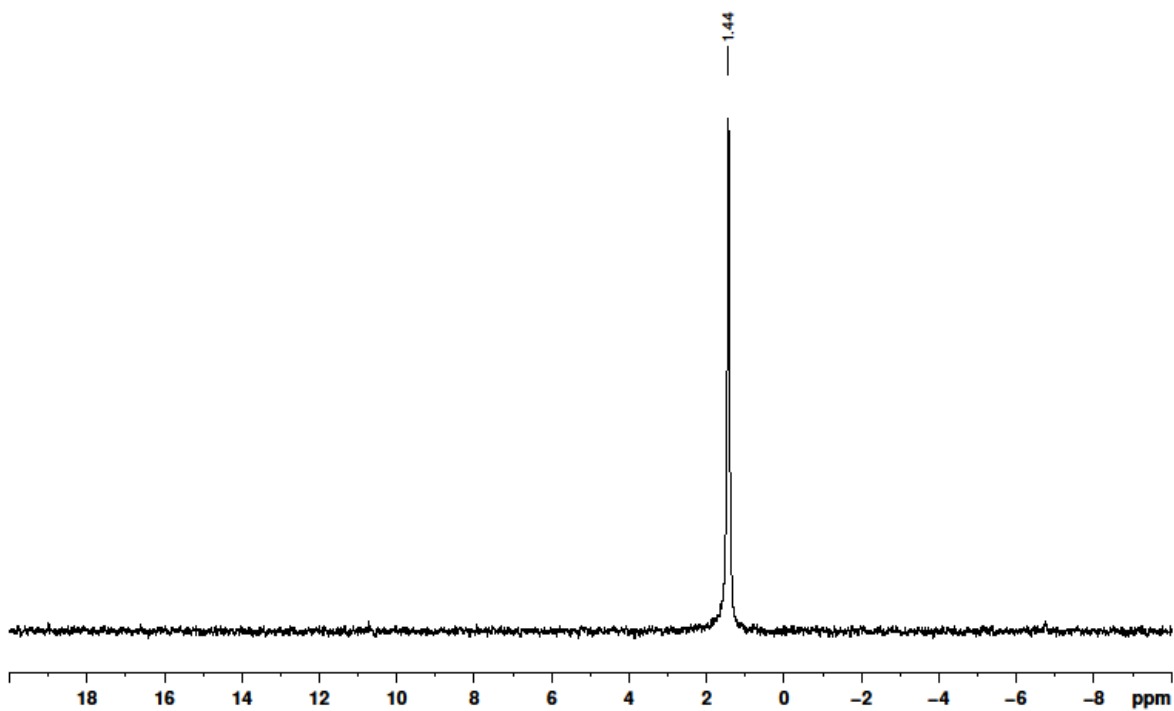

**Figure S22.**  $^{31}\text{P}\{^1\text{H}\}$  NMR spectrum (202.45 MHz) of phosphinimidic amide **15** in  $\text{CDCl}_3$ .

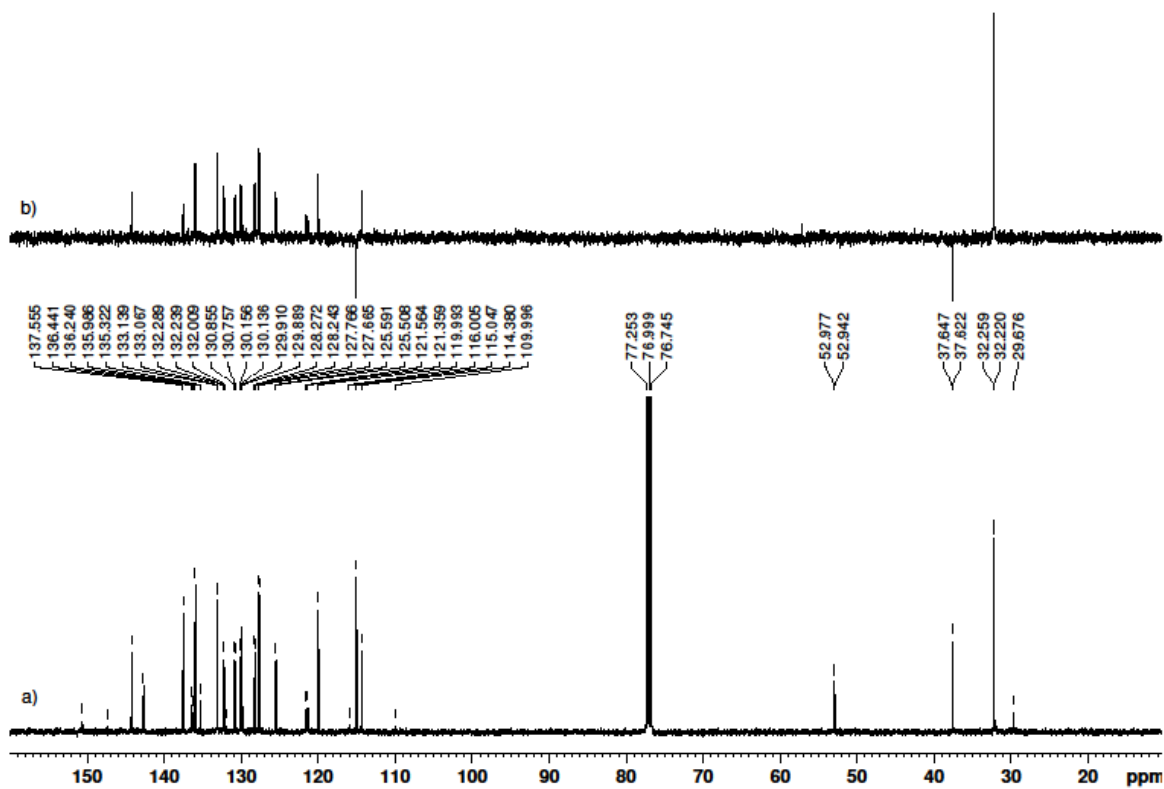

**Figure S23.**  $^{13}\text{C}\{^1\text{H}\}$  (a) and dept135 (b) NMR spectra (125.76 MHz) of phosphinimidic amide **15** in  $\text{CDCl}_3$ .

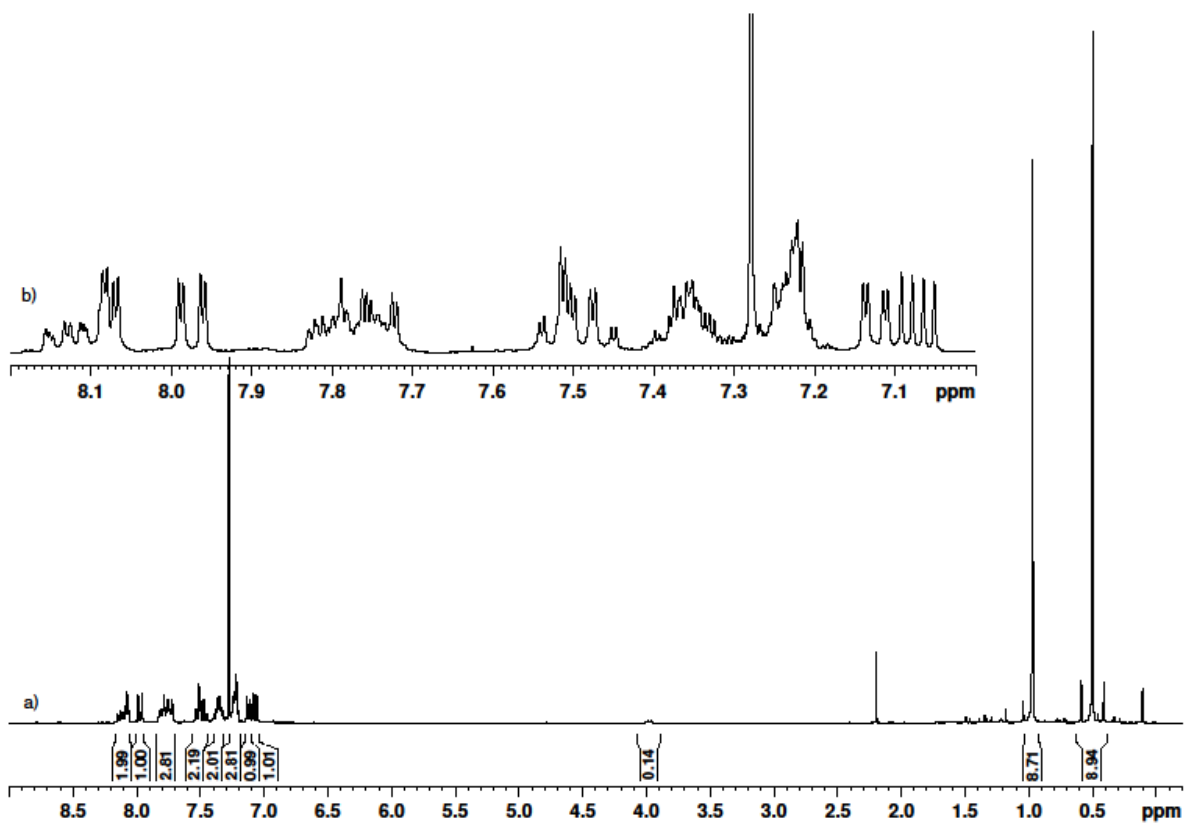

Figure S24.  $^1\text{H}$  NMR spectrum (300.13 MHz) of phosphinimidic amide **16** in  $\text{CDCl}_3$ .

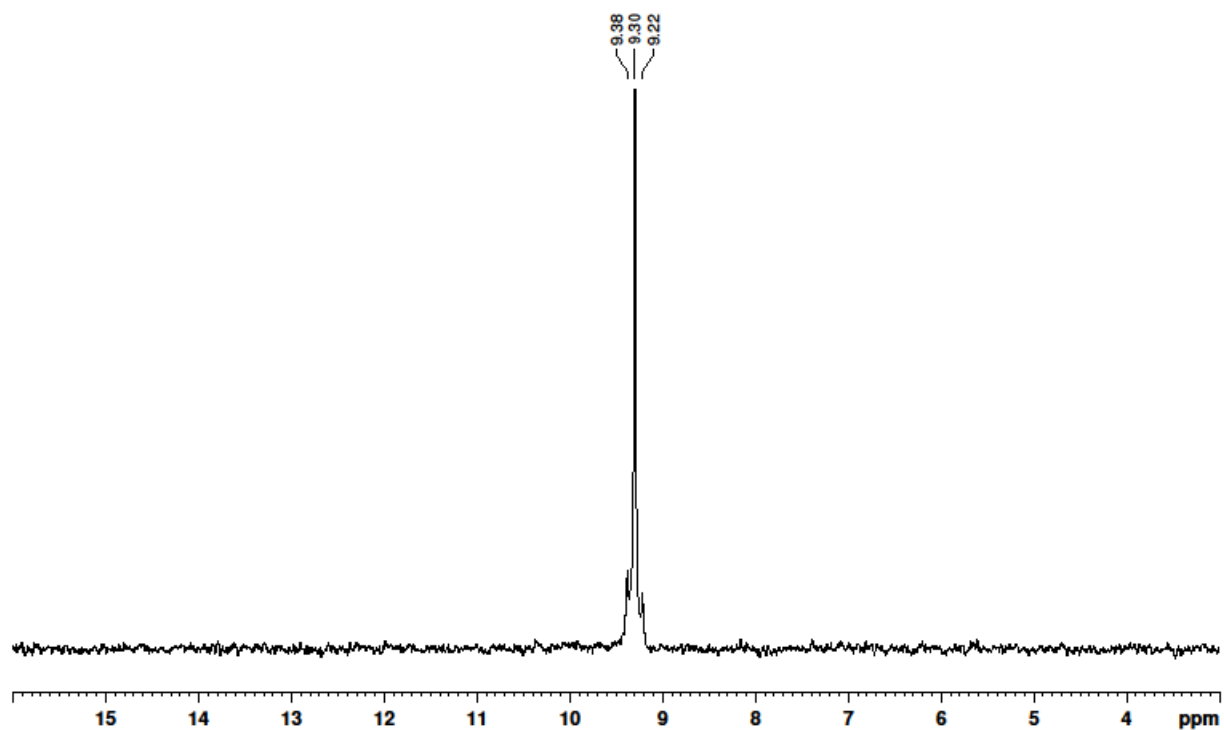

Figure S25.  $^{31}\text{P}\{^1\text{H}\}$  NMR spectrum (121.49 MHz) of phosphinimidic amide **16** in  $\text{CDCl}_3$ .

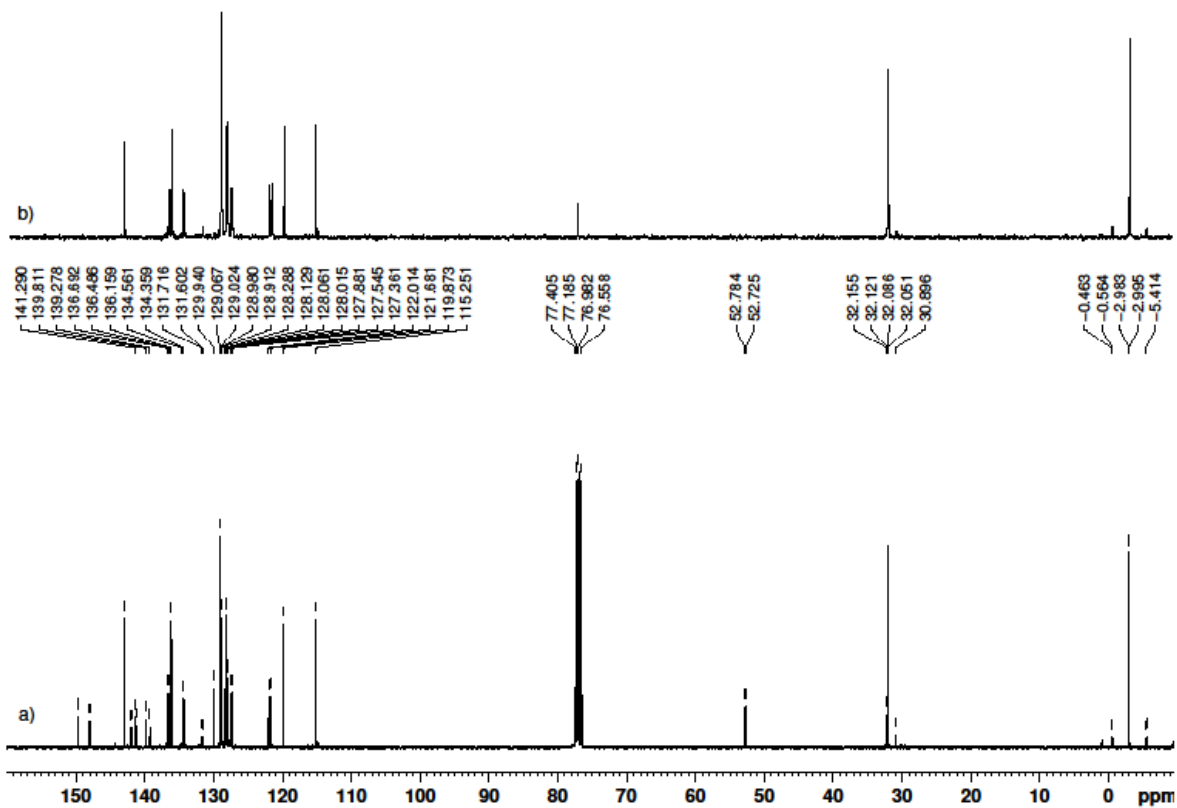

**Figure S26.**  $^{13}\text{C}\{^1\text{H}\}$  (a) and dept135 (b) NMR spectra (75.46 MHz) of phosphinimidic amide **16** in  $\text{CDCl}_3$ .

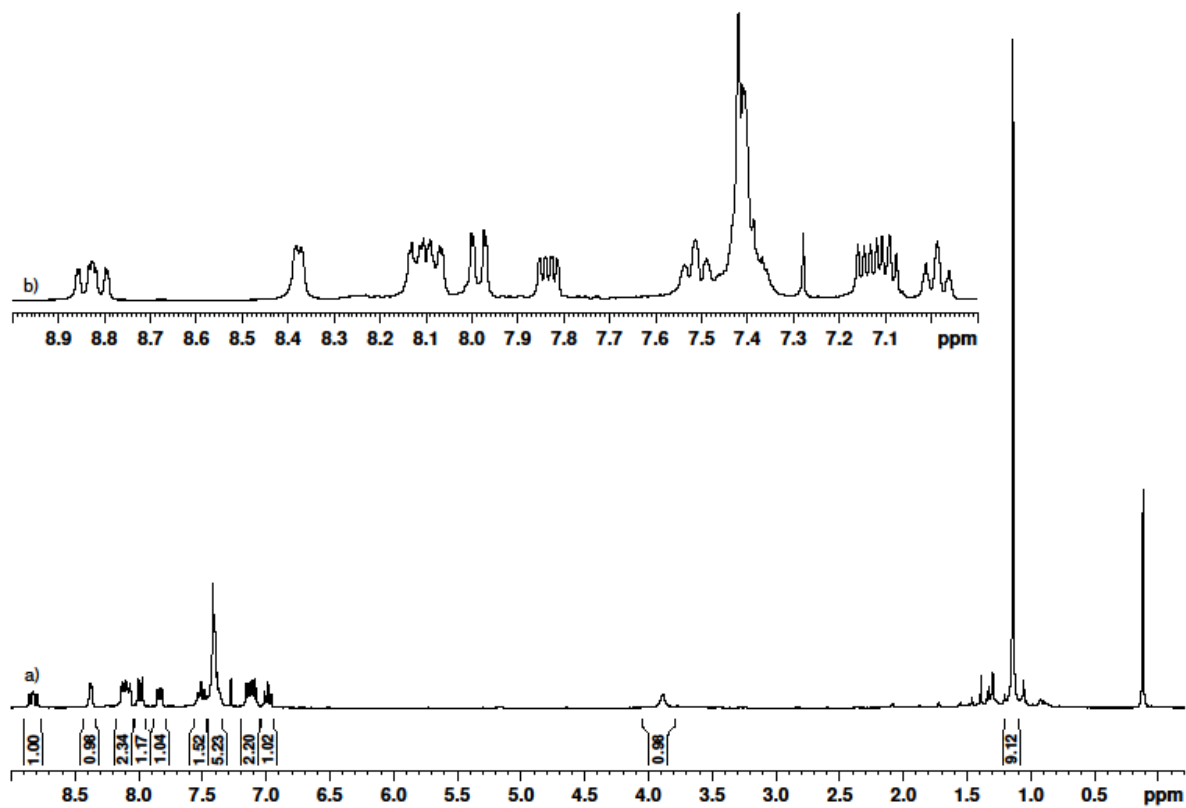

**Figure S27.**  $^1\text{H}$  NMR spectrum (300.13 MHz) of phosphinimidic amide **17** in  $\text{CDCl}_3$ .



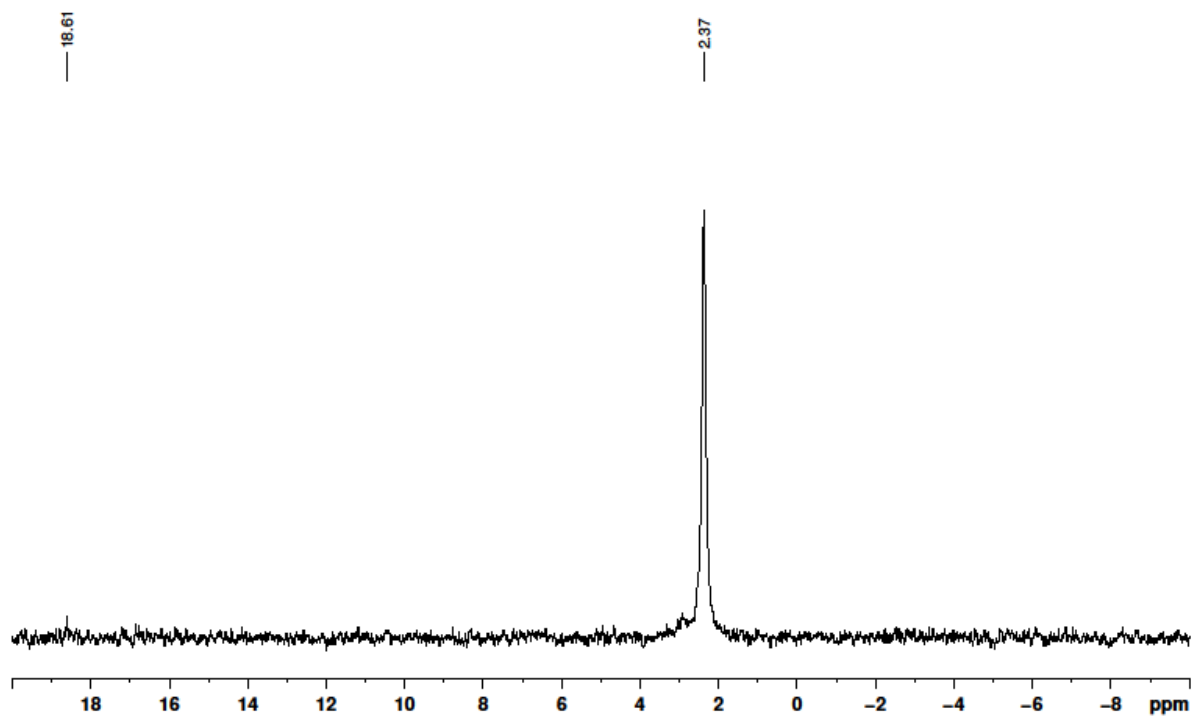

**Figure S28.**  $^{31}\text{P}\{^1\text{H}\}$  NMR spectrum (121.49 MHz) of phosphinimidic amide **17** in  $\text{CDCl}_3$ .

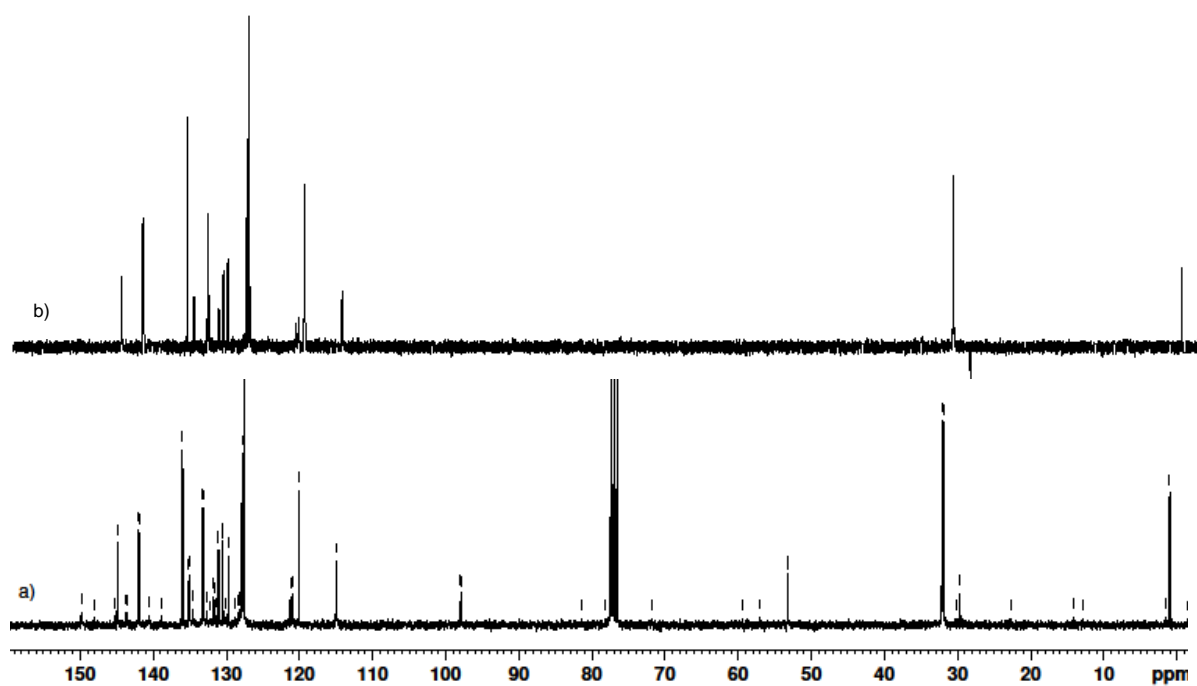

**Figure S29.**  $^{13}\text{C}\{^1\text{H}\}$  (a) and dept135 (b) NMR spectra (75.46 MHz) of phosphinimidic amide **17** in  $\text{CDCl}_3$ .

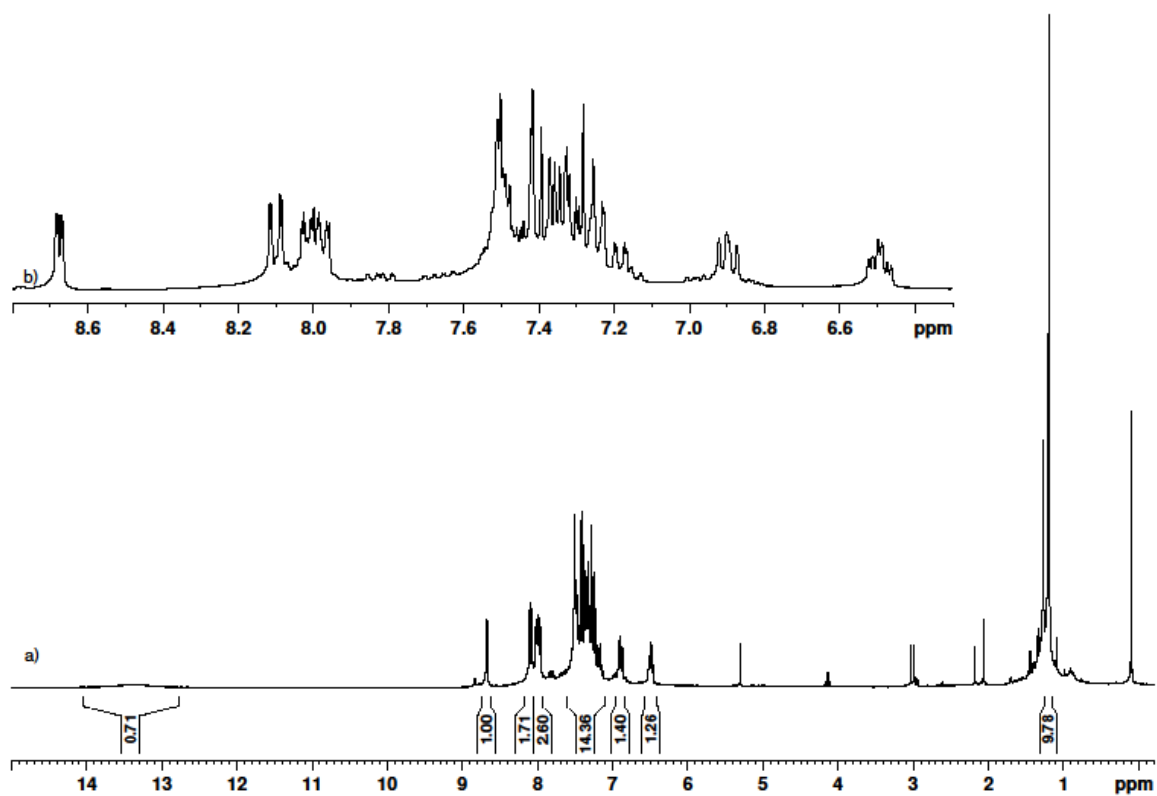

Figure S30.  $^1\text{H}$  NMR spectrum (300.13 MHz) of phosphinimidic amide **18** in  $\text{CDCl}_3$ .

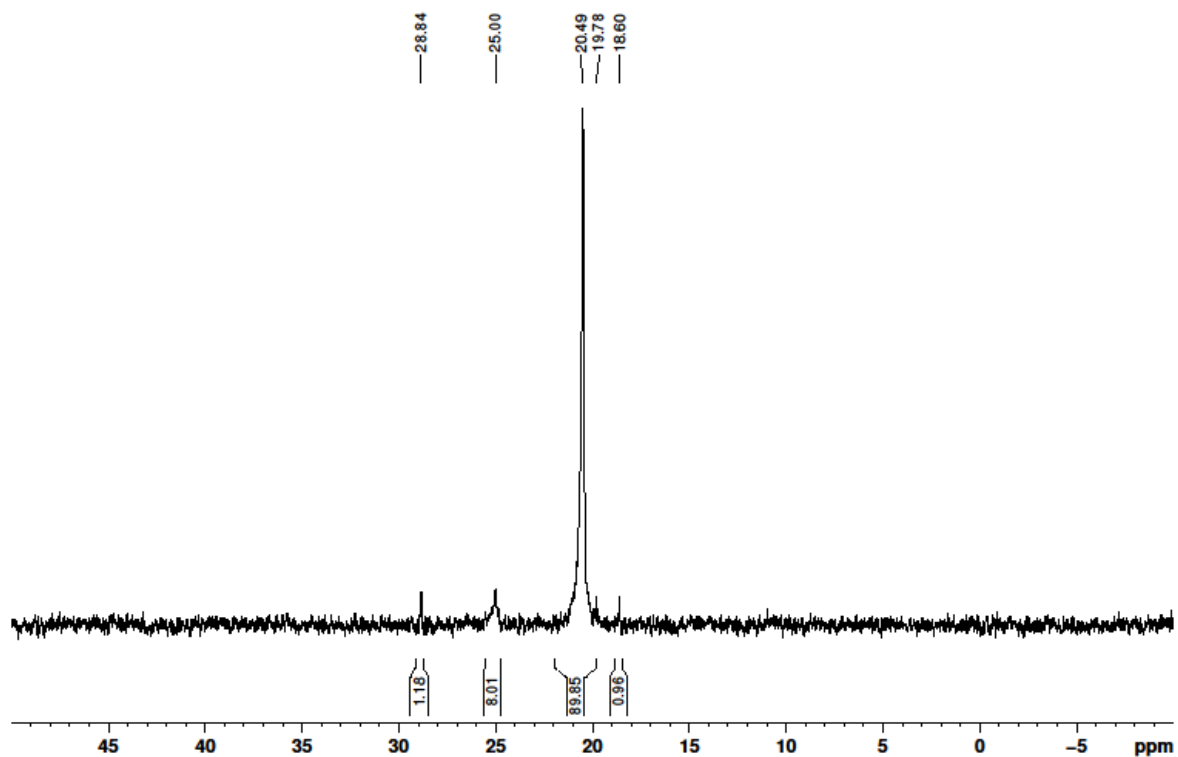

Figure S31.  $^{31}\text{P}\{^1\text{H}\}$  NMR spectrum (121.49 MHz) of phosphinimidic amide **18** in  $\text{CDCl}_3$ .

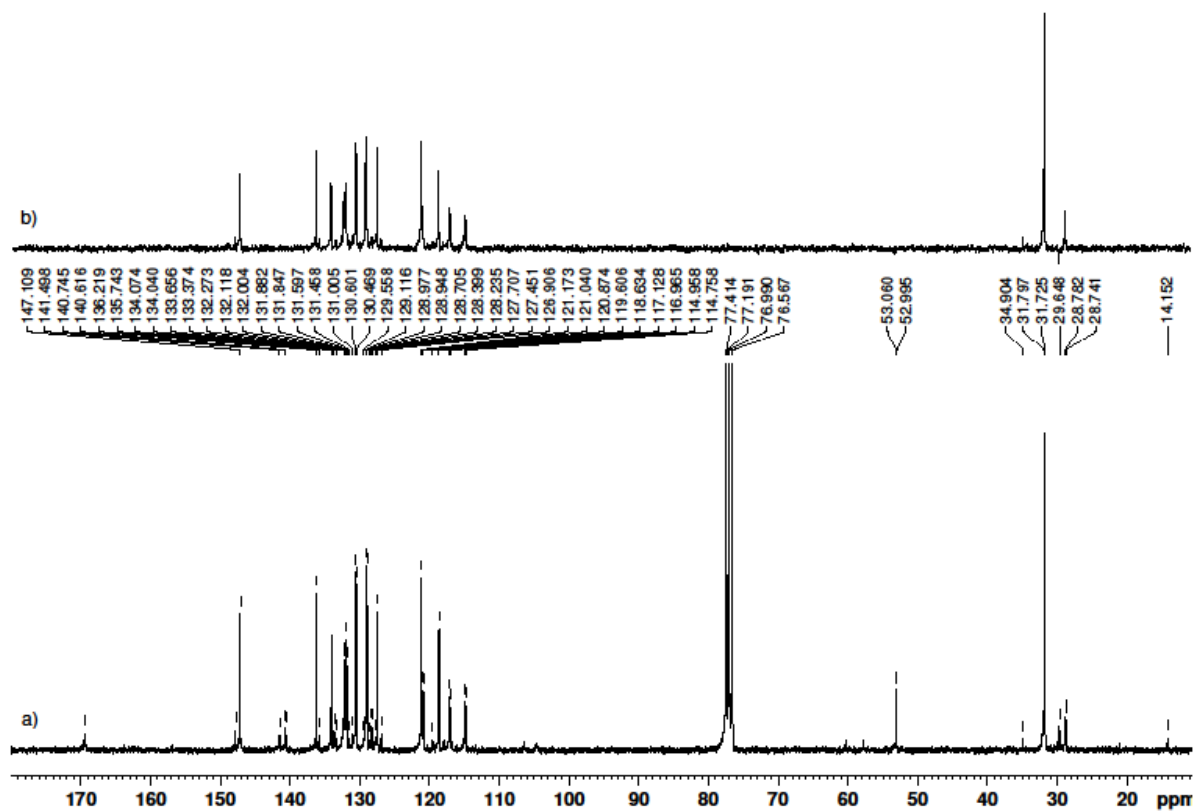

**Figure S32.**  $^{13}\text{C}\{^1\text{H}\}$  (a) and dept135 (b) NMR spectra (75.46 MHz) of phosphinimidic amide **18** in  $\text{CDCl}_3$ .

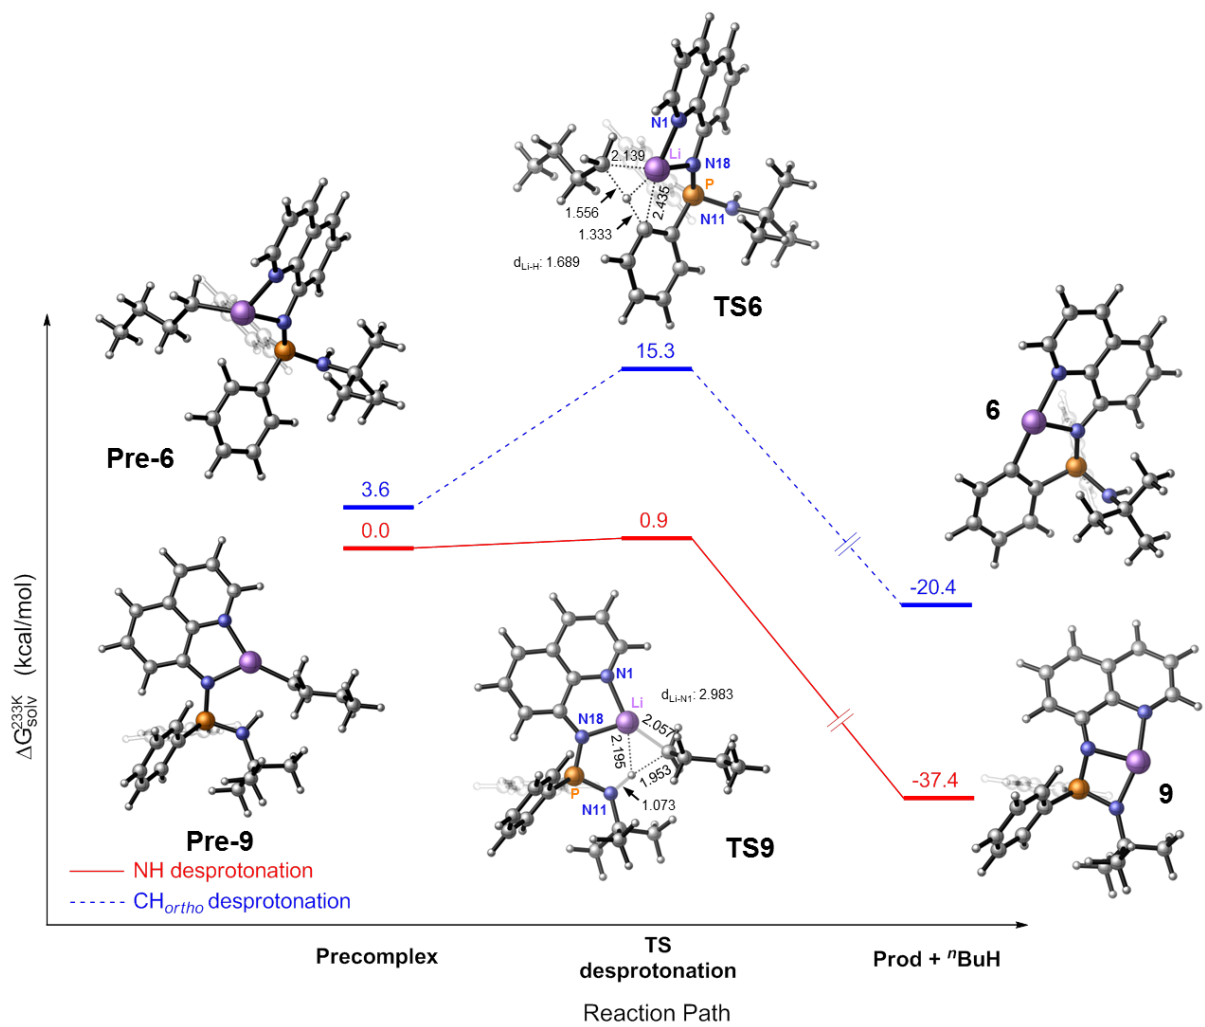

**Figure S33.** Computed reaction pathway for the NH vs.  $\text{CH}_{\text{ortho}}$  deprotonation of 5.

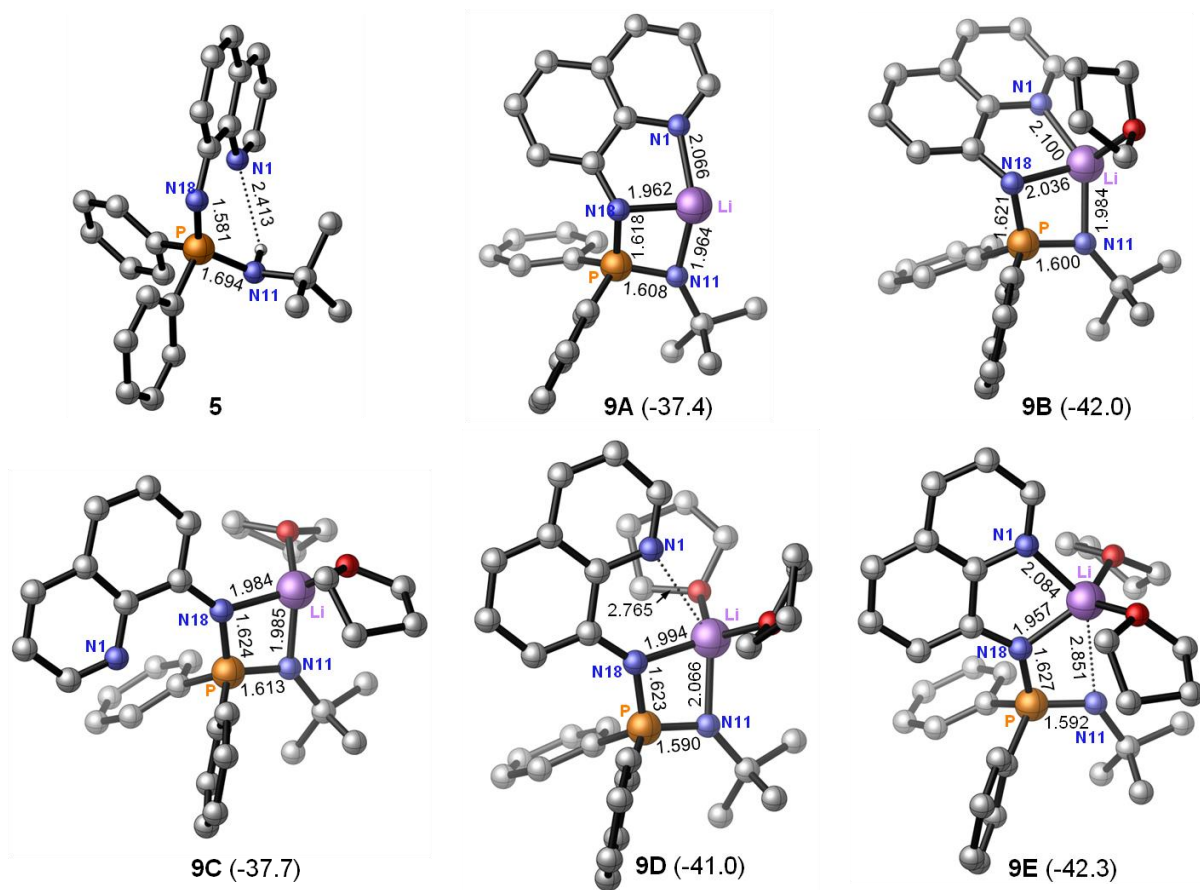

**Figure S34.** Computed structures of monomers. Hydrogen atoms are omitted for clarity. Free energies and enthalpies (in parentheses) are given in kcal/mol with respect to the equations: a) **Pre-9**  $\rightarrow$  **9A** + **<sup>t</sup>BuH**, b) **Pre-9** + THF  $\rightarrow$  **9A** + **<sup>t</sup>BuH**, and c) **Pre-9** + 2THF  $\rightarrow$  **9B-E** + **<sup>t</sup>BuH**.

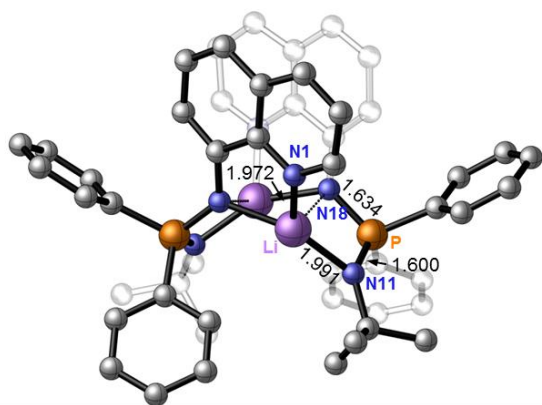

**Dimer-A**  
-47.3 (-45.4)

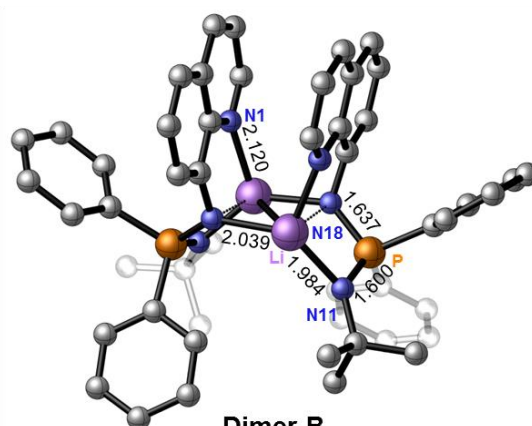

**Dimer-B**  
-46.4 (-44.4)

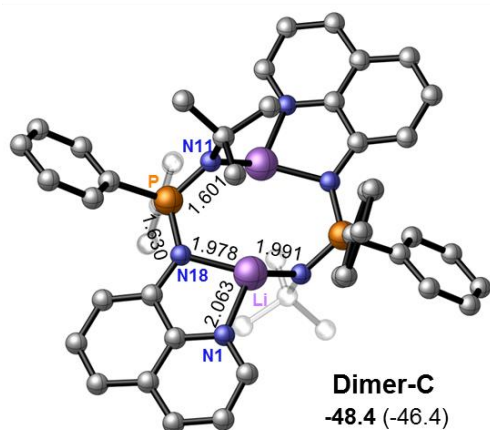

**Dimer-C**  
-48.4 (-46.4)

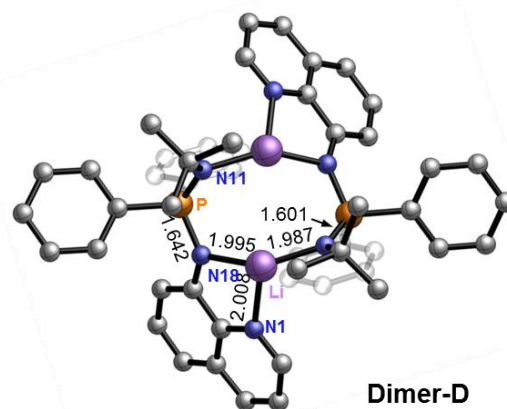

**Dimer-D**  
-46.4 (-44.1)

**Figure S35.** Computed structures of dimers. Hydrogen atoms are omitted for clarity. Free energies and enthalpies (in parentheses) are given in kcal/mol with respect to the equation: **Pre-9**  $\rightarrow$   $\frac{1}{2}$ **Dimer** + ***n*BuH**. Selected bond distances are given in Å.

**Table S1.** The Cartesian coordinates (Å), SCF energies, enthalpies at 233K and and Gibbs free energies at 233K for the optimized structures.

**5**

M06-2X SCF energy: -1473.43493538 a.u.  
M06-2X enthalpy: -1472.95769500 a.u.  
M06-2X free energy: -1473.01359900 a.u.

Cartesian coordinates

| ATOM | X           | Y           | Z           |
|------|-------------|-------------|-------------|
| P    | 0.75603400  | -0.04163400 | -0.07254800 |
| C    | 0.50690700  | 1.76232700  | 0.00824000  |
| C    | -0.12376400 | 2.37464100  | -1.07717500 |
| C    | 0.94252700  | 2.53835700  | 1.08523200  |
| C    | -0.32081700 | 3.75165300  | -1.08339900 |
| H    | -0.47032800 | 1.76274500  | -1.90612400 |
| C    | 0.74165100  | 3.91654300  | 1.07619200  |
| H    | 1.43091200  | 2.06400300  | 1.93168800  |
| C    | 0.11137800  | 4.52358000  | -0.00699700 |
| H    | -0.81635400 | 4.22247800  | -1.92675900 |
| H    | 1.07876700  | 4.51645400  | 1.91613800  |
| H    | -0.04402600 | 5.59816300  | -0.01200900 |
| C    | 2.46689000  | -0.25613400 | -0.63998100 |
| C    | 2.72386400  | -0.81339700 | -1.89259600 |
| C    | 3.52827900  | 0.17680500  | 0.16052400  |
| C    | 4.03735900  | -0.94635300 | -2.33708100 |
| C    | 4.83817800  | 0.04472200  | -0.28738700 |
| H    | 3.32455200  | 0.59735700  | 1.14158000  |
| C    | 5.09321000  | -0.51827500 | -1.53711400 |
| H    | 4.23574100  | -1.38611400 | -3.30971200 |
| H    | 5.66065400  | 0.37714600  | 0.33845500  |
| H    | 6.11633600  | -0.62302100 | -1.88551600 |
| N    | 0.80890900  | -0.44080300 | 1.57240000  |
| N    | -0.12542200 | -0.81005000 | -1.13681400 |
| C    | -1.48474000 | -0.93416700 | -1.27013800 |
| C    | -2.45790000 | -0.38310400 | -0.35401400 |
| C    | -1.98250100 | -1.64268200 | -2.36047300 |
| C    | -3.85162400 | -0.55622900 | -0.59735000 |
| C    | -3.35968400 | -1.81322500 | -2.58365100 |
| H    | -1.25989600 | -2.06526700 | -3.05077400 |
| C    | -2.86540300 | -0.83539400 | 1.56006900  |
| C    | -4.74911300 | 0.02968800  | 0.33190300  |
| C    | -4.29406500 | -1.28190800 | -1.72682000 |
| H    | -3.68296800 | -2.37477200 | -3.45560800 |
| C    | -4.26735500 | 0.72907900  | 1.40565700  |
| H    | -2.45031900 | 1.38597800  | 2.40382700  |
| H    | -5.81844100 | -0.08513200 | 0.17168800  |
| H    | -5.35910500 | -1.40574800 | -1.89845300 |
| H    | -4.93032400 | 1.19244800  | 2.12825900  |
| N    | -2.00260700 | 0.30109900  | 0.72861900  |
| C    | 0.82556100  | -1.84636800 | 2.06001600  |
| C    | 1.87436200  | -2.67174700 | 1.31512800  |
| H    | 1.90228300  | -3.67793100 | 1.74523100  |
| H    | 2.86919000  | -2.22673500 | 1.40545500  |
| H    | 1.62916500  | -2.76605000 | 0.25220200  |
| C    | -0.55461400 | -2.49453100 | 1.89372200  |
| H    | -1.32281000 | -1.91172100 | 2.41444000  |
| H    | -0.55111700 | -3.50732800 | 2.31110300  |
| H    | -0.83029800 | -2.55415300 | 0.83651400  |
| C    | 1.19253700  | -1.77359200 | 3.54406700  |
| H    | 1.20923700  | -2.77580400 | 3.98431200  |
| H    | 0.45922800  | -1.17421200 | 4.09603600  |
| H    | 2.17757700  | -1.31470300 | 3.67013500  |
| H    | 0.02475500  | 0.04507400  | 2.01102900  |
| H    | 1.88418000  | -1.14683000 | -2.49380100 |

**Pre-6**

M06-2X SCF energy: -1638.72589863 a.u.  
M06-2X enthalpy: -1638.11976300 a.u.  
M06-2X free energy: -1638.18754500 a.u.  
M06-2X SCF energy in solution: -1639.13149841 a.u.  
M06-2X enthalpy in solution: -1638.52536278 a.u.  
M06-2X free energy in solution: -1638.59314478 a.u.

Cartesian coordinates

| ATOM | X           | Y           | Z           |
|------|-------------|-------------|-------------|
| P    | -0.50351400 | 0.98991900  | 0.12324700  |
| C    | -1.16859000 | 0.22698700  | 1.62951800  |
| C    | -0.90625400 | -1.13404100 | 1.81741100  |
| C    | -1.98666600 | 0.91813500  | 2.52920300  |
| C    | -1.45387700 | -1.79423700 | 2.91423500  |
| H    | -0.29568300 | -1.67484600 | 1.09552500  |
| C    | -2.52069800 | 0.25336900  | 3.62831400  |
| H    | -2.21991800 | 1.96685600  | 2.36300000  |
| C    | -2.25356500 | -1.10136300 | 3.81966100  |
| H    | -1.25766300 | -2.85253100 | 3.05329300  |
| H    | -3.15412800 | 0.78878600  | 4.32854700  |
| H    | -2.67921600 | -1.61980900 | 4.67332400  |
| C    | -1.83894800 | 0.97911200  | -1.09380000 |
| C    | -2.04412200 | -0.12727300 | -1.92189500 |
| C    | -2.75358300 | 2.03877800  | -1.10615400 |
| C    | -3.13254100 | -0.14373900 | -2.79173100 |
| C    | -3.83655000 | 2.01448600  | -1.97757700 |
| H    | -2.60545100 | 2.88249300  | -0.43830800 |
| C    | -4.02203300 | 0.92561500  | -2.82769800 |
| H    | -3.28622700 | -1.00867100 | -3.42940800 |
| H    | -4.53667200 | 2.84394000  | -1.99117900 |
| H    | -4.86919300 | 0.90632300  | -3.50662300 |
| N    | -0.31599600 | 2.59732800  | 0.58846300  |
| N    | 0.75994100  | 0.20067300  | -0.47149000 |
| C    | 1.93668700  | 0.02932700  | 0.24708400  |
| C    | 2.99529100  | -0.71121700 | -0.40289400 |
| C    | 2.20740400  | 0.50559300  | 1.52545800  |
| C    | 4.26395700  | -0.85749200 | 0.21836800  |
| C    | 3.46660500  | 0.33893100  | 2.13998300  |
| H    | 1.43837900  | 1.03451000  | 2.07898400  |
| C    | 3.66489200  | -1.95238800 | -2.23263300 |
| C    | 5.25724300  | -1.57645500 | -0.49201000 |
| C    | 4.49164200  | -0.31190100 | 1.50573000  |
| H    | 3.61488700  | 0.74448900  | 3.13646200  |
| C    | 4.96899800  | -2.11779700 | -1.71648800 |
| H    | 3.38899100  | -2.40340800 | -3.18258300 |
| H    | 6.24042600  | -1.69525000 | -0.04369000 |
| H    | 5.46370900  | -0.43373800 | 1.97342600  |
| H    | 5.70640200  | -2.67836000 | -2.27990900 |
| N    | 2.72377800  | -1.27726700 | -1.61189300 |
| Li   | 0.70884800  | -1.44438500 | -1.66133000 |
| C    | 0.42362000  | 3.64602900  | -0.16491900 |
| C    | 0.22011600  | 3.48516700  | -1.67251100 |
| H    | 0.80155900  | 4.25722000  | -2.18554800 |
| H    | -0.82843000 | 3.60111500  | -1.95609600 |
| H    | 0.57373500  | 2.50951000  | -2.02218000 |
| C    | 1.92040400  | 3.57902200  | 0.15453700  |
| H    | 2.09256100  | 3.63116700  | 1.23609200  |
| H    | 2.44460800  | 4.41902400  | -0.31314700 |
| H    | 2.35567700  | 2.64651300  | -0.21430400 |
| C    | -0.14787100 | 4.99023000  | 0.29275800  |
| H    | 0.36082000  | 5.81382900  | -0.21761300 |
| H    | -0.00981100 | 5.12682000  | 1.37177900  |

|   |             |             |             |
|---|-------------|-------------|-------------|
| H | -1.21786700 | 5.04869600  | 0.07173700  |
| H | -0.17661800 | 2.69582700  | 1.59162800  |
| C | -0.34573800 | -3.13959700 | -1.21093800 |
| H | -0.11807600 | -3.95591500 | -1.92003500 |
| H | 0.23807400  | -3.41828100 | -0.30490200 |
| H | -1.39244300 | -1.00152300 | -1.87048200 |
| C | -1.82818600 | -3.25233900 | -0.84068000 |
| H | -2.15550400 | -2.39337800 | -0.22538000 |
| H | -2.44824000 | -3.18719800 | -1.75197700 |
| C | -2.24050500 | -4.52000200 | -0.08201500 |
| H | -1.62174800 | -4.59804300 | 0.82401700  |
| H | -1.99175400 | -5.39879400 | -0.69164400 |
| C | -3.71894200 | -4.54575000 | 0.30308500  |
| H | -3.99204100 | -5.45746300 | 0.84524100  |
| H | -3.96559400 | -3.68841300 | 0.94091600  |
| H | -4.35459600 | -4.48339200 | -0.58762800 |

## TS6

|                                 |                           |
|---------------------------------|---------------------------|
| M06-2X SCF energy:              | -1638.70871634 a.u.       |
| M06-2X enthalpy:                | -1638.10718700 a.u.       |
| M06-2X free energy:             | -1638.17244700 a.u.       |
| M06-2X SCF energy in solution:  | -1639.11087147 a.u.       |
| M06-2X enthalpy in solution:    | -1638.50934213 a.u.       |
| M06-2X free energy in solution: | -1638.57460213 a.u.       |
| Frequency:                      | -1242.90 cm <sup>-1</sup> |

### Cartesian coordinates

| ATOM | X           | Y           | Z           |
|------|-------------|-------------|-------------|
| P    | 0.78807200  | -0.85304100 | 0.17409000  |
| C    | 1.26078600  | 0.17976100  | 1.59307900  |
| C    | 0.57204300  | 1.38120000  | 1.78521400  |
| C    | 2.33512600  | -0.14997300 | 2.42666000  |
| C    | 0.94819500  | 2.23869100  | 2.81543400  |
| H    | -0.24404400 | 1.64793000  | 1.11755700  |
| C    | 2.70383400  | 0.70901800  | 3.45713100  |
| H    | 2.89157400  | -1.06872200 | 2.25997000  |
| C    | 2.01004200  | 1.90196100  | 3.65148500  |
| H    | 0.41525000  | 3.17374900  | 2.95807200  |
| H    | 3.53863300  | 0.45235600  | 4.10174000  |
| H    | 2.30342800  | 2.57416400  | 4.45196900  |
| C    | 1.93644700  | -0.54762300 | -1.18167100 |
| C    | 1.60211400  | 0.43321900  | -2.12772900 |
| C    | 3.15308400  | -1.24132100 | -1.21267800 |
| C    | 2.54180900  | 0.66513300  | -3.13928800 |
| C    | 4.05464000  | -0.98885100 | -2.24014700 |
| H    | 3.38112800  | -1.98382300 | -0.45075500 |
| C    | 3.74210300  | -0.03765200 | -3.21226400 |
| H    | 2.33183200  | 1.43521800  | -3.88158700 |
| H    | 4.99605900  | -1.52830400 | -2.28242300 |
| H    | 4.44714000  | 0.16183300  | -4.01535900 |
| N    | 1.10018100  | -2.39611700 | 0.78030400  |
| N    | -0.67273100 | -0.50428100 | -0.38774600 |
| C    | -1.85390900 | -0.49032000 | 0.31989700  |
| C    | -3.01346100 | 0.00077600  | -0.39043900 |
| C    | -2.04606600 | -0.90324600 | 1.63310100  |
| C    | -4.28711900 | 0.02065000  | 0.23609200  |
| C    | -3.31643500 | -0.87180000 | 2.24604800  |
| H    | -1.19822800 | -1.26611400 | 2.20711900  |
| C    | -3.86790000 | 0.91099800  | -2.33318400 |
| C    | -5.37730300 | 0.51342300  | -0.52318400 |
| C    | -4.42586800 | -0.42920100 | 1.57295100  |
| H    | -3.40619200 | -1.20984400 | 3.27423000  |
| C    | -5.17629700 | 0.95622600  | -1.80371000 |
| H    | -3.67385100 | 1.27267400  | -3.34021700 |
| H    | -6.36542100 | 0.53728400  | -0.07056700 |
| H    | -5.40375200 | -0.40701100 | 2.04380600  |
| H    | -5.98938500 | 1.34366800  | -2.40721100 |

|    |             |             |             |
|----|-------------|-------------|-------------|
| N  | -2.83224800 | 0.45177400  | -1.66572300 |
| Li | -0.81679400 | 0.66234600  | -1.96687000 |
| C  | 0.64021900  | -3.66935700 | 0.16760100  |
| C  | 0.75414500  | -3.61453800 | -1.35650000 |
| H  | 0.40528700  | -4.56723900 | -1.76678600 |
| H  | 1.78567800  | -3.45499600 | -1.67867000 |
| H  | 0.13119200  | -2.81739200 | -1.77550900 |
| C  | -0.81327000 | -3.95274100 | 0.56120000  |
| H  | -0.92691200 | -3.96220000 | 1.65188000  |
| H  | -1.12906700 | -4.92959900 | 0.18003100  |
| H  | -1.48005200 | -3.18696200 | 0.15479600  |
| C  | 1.55550800  | -4.76782000 | 0.71309800  |
| H  | 1.26391800  | -5.74253900 | 0.30977400  |
| H  | 1.49110800  | -4.82324300 | 1.80625100  |
| H  | 2.59567600  | -4.56973200 | 0.43808500  |
| H  | 1.02811000  | -2.43033100 | 1.79527400  |
| C  | -0.14224000 | 2.66020600  | -1.60839000 |
| H  | -0.53685400 | 3.27644000  | -2.43256700 |
| H  | -0.96375800 | 2.59999200  | -0.86571500 |
| H  | 0.70107500  | 1.40318300  | -1.96838000 |
| C  | 1.04261100  | 3.37315200  | -0.95308500 |
| H  | 1.62231600  | 2.65851000  | -0.34154400 |
| H  | 1.74794700  | 3.70485700  | -1.73069600 |
| C  | 0.69532500  | 4.56761700  | -0.06229900 |
| H  | -0.03453300 | 4.23884600  | 0.69289600  |
| H  | 0.18128200  | 5.33073300  | -0.66115300 |
| C  | 1.91382900  | 5.17236500  | 0.63242300  |
| H  | 1.64667900  | 6.02165300  | 1.27019400  |
| H  | 2.41072800  | 4.42149700  | 1.25839900  |
| H  | 2.64696100  | 5.52269200  | -0.10259000 |

## 6

|                                 |                     |
|---------------------------------|---------------------|
| M06-2X SCF energy:              | -1480.39418283 a.u. |
| M06-2X enthalpy:                | -1479.92679600 a.u. |
| M06-2X free energy:             | -1479.98351100 a.u. |
| M06-2X SCF energy in solution:  | -1480.74781926 a.u. |
| M06-2X enthalpy in solution:    | -1480.28043243 a.u. |
| M06-2X free energy in solution: | -1480.33714743 a.u. |

### Cartesian coordinates

| ATOM | X           | Y           | Z           |
|------|-------------|-------------|-------------|
| P    | 0.96227700  | 0.09185900  | 0.07330400  |
| C    | 1.21364600  | 1.74728300  | -0.64768100 |
| C    | 0.28348800  | 2.20563400  | -1.58508200 |
| C    | 2.32058400  | 2.54145900  | -0.32817400 |
| C    | 0.45416000  | 3.44748800  | -2.18928600 |
| H    | -0.57425500 | 1.58676800  | -1.83343100 |
| C    | 2.48796200  | 3.78274900  | -0.93492400 |
| H    | 3.05186100  | 2.18667100  | 0.39278400  |
| C    | 1.55483900  | 4.23644000  | -1.86429400 |
| H    | -0.27386300 | 3.79955900  | -2.91327300 |
| H    | 3.34943700  | 4.39402900  | -0.68453400 |
| H    | 1.68724800  | 5.20480400  | -2.33704000 |
| C    | 1.96309300  | -1.14399600 | -0.77438700 |
| C    | 1.29928300  | -2.16225800 | -1.49499000 |
| C    | 3.35686900  | -0.99670800 | -0.67652600 |
| C    | 2.19566700  | -3.05314800 | -2.12662300 |
| C    | 4.17464700  | -1.91007700 | -1.32300900 |
| H    | 3.79461200  | -0.19168400 | -0.08766600 |
| C    | 3.58178200  | -2.94479800 | -2.05220600 |
| H    | 1.79233400  | -3.88258900 | -2.70831100 |
| H    | 5.25546800  | -1.82329700 | -1.26092700 |
| H    | 4.21407700  | -3.66893900 | -2.56203700 |
| N    | 1.60378800  | 0.35834000  | 1.61479100  |
| N    | -0.55941100 | -0.39219900 | -0.08442800 |
| C    | -1.72876000 | 0.21805400  | 0.27265500  |
| C    | -2.93311600 | -0.43115800 | -0.19814700 |



|    |             |             |             |   |             |             |             |
|----|-------------|-------------|-------------|---|-------------|-------------|-------------|
| C  | -1.88370600 | 1.37358600  | 1.02965500  | C | -0.97544400 | -3.07977900 | -1.10898000 |
| C  | -4.20963900 | 0.09776900  | 0.12544600  | C | 0.10408200  | -1.62893300 | -2.71044500 |
| C  | -3.15958300 | 1.89003400  | 1.33943400  | C | -1.44714700 | -3.87380500 | -2.15185300 |
| H  | -1.00002500 | 1.89176700  | 1.39179000  | H | -1.21821800 | -3.34698100 | -0.08490000 |
| C  | -3.86702600 | -2.16420300 | -1.40392200 | C | -0.37123000 | -2.42089200 | -3.74937700 |
| C  | -5.34283400 | -0.59400600 | -0.36844000 | H | 0.71082800  | -0.75022300 | -2.91641900 |
| C  | -4.30819500 | 1.27601200  | 0.90824000  | C | -1.14447700 | -3.54654300 | -3.47013700 |
| H  | -3.22360700 | 2.79558800  | 1.93576300  | H | -2.05364200 | -4.74674000 | -1.93203100 |
| C  | -5.17927400 | -1.72197900 | -1.12926300 | H | -0.13765500 | -2.16109900 | -4.77703400 |
| H  | -3.70902300 | -3.05306300 | -2.01044900 | H | -1.51318800 | -4.16686000 | -4.28127600 |
| H  | -6.33469500 | -0.21491200 | -0.13519500 | C | 0.58154100  | -1.69401600 | 1.44074800  |
| H  | -5.28876100 | 1.67384800  | 1.15028200  | C | 0.42459900  | -0.95576800 | 2.61978100  |
| H  | -6.02679000 | -2.27253500 | -1.52178800 | C | 0.95642700  | -3.03918500 | 1.51475700  |
| N  | -2.78718600 | -1.55385900 | -0.96338100 | C | 0.65791700  | -1.55149700 | 3.85438100  |
| Li | -0.74264800 | -1.93927300 | -1.23420100 | C | 1.18801700  | -3.63315400 | 2.75289000  |
| C  | 1.48091000  | -0.58697600 | 2.75226000  | H | 1.06784100  | -3.62803400 | 0.60869900  |
| C  | 1.77660200  | -2.01629500 | 2.29782300  | C | 1.04368800  | -2.88900300 | 3.92115800  |
| H  | 1.74130700  | -2.67670400 | 3.17007700  | H | 0.53734000  | -0.97297800 | 4.76471200  |
| H  | 2.76561200  | -2.08933900 | 1.83779500  | H | 1.48169000  | -4.67686900 | 2.80382300  |
| H  | 1.03882500  | -2.37154400 | 1.57114200  | H | 1.22760900  | -3.35316200 | 4.88518000  |
| C  | 0.07475800  | -0.51290800 | 3.35849700  | N | 1.72813200  | -0.02278500 | -0.59804200 |
| H  | -0.15695300 | 0.50987800  | 3.67913900  | N | -0.70760300 | 0.43456200  | 0.05728800  |
| H  | -0.00171900 | -1.16752100 | 4.23323900  | C | -2.04070100 | 0.32012900  | 0.37183900  |
| H  | -0.67670700 | -0.82015300 | 2.62498900  | C | -2.84510800 | 1.50380200  | 0.15879800  |
| C  | 2.52240600  | -0.15229300 | 3.78570300  | C | -2.68749000 | -0.79041000 | 0.90087200  |
| H  | 2.48075700  | -0.80156400 | 4.66576200  | C | -4.23206900 | 1.50101100  | 0.45960100  |
| H  | 2.33792200  | 0.87638700  | 4.11825600  | C | -4.06844400 | -0.78037300 | 1.19266500  |
| H  | 3.52709100  | -0.20264900 | 3.35629700  | H | -2.11664800 | -1.68590400 | 1.12154300  |
| H  | 1.45190900  | 1.31693300  | 1.92495600  | C | -2.92138300 | 3.70483500  | -0.54193800 |

### <sup>n</sup>BuH (*n*-butane)

|                                 |                    |
|---------------------------------|--------------------|
| M06-2X SCF energy:              | -158.35738499 a.u. |
| M06-2X enthalpy:                | -158.21879100 a.u. |
| M06-2X free energy:             | -158.24411700 a.u. |
| M06-2X SCF energy in solution:  | -158.40755233 a.u. |
| M06-2X enthalpy in solution:    | -158.26895834 a.u. |
| M06-2X free energy in solution: | -158.29428434 a.u. |

### Cartesian coordinates

| ATOM | X           | Y           | Z           |
|------|-------------|-------------|-------------|
| C    | 1.94876400  | -0.11984200 | 0.00028400  |
| H    | 2.08709800  | -0.75164100 | 0.88413300  |
| C    | 0.56183100  | 0.51754100  | -0.00030300 |
| H    | 0.45185100  | 1.16757300  | 0.87747800  |
| H    | 0.45233000  | 1.16699100  | -0.87858500 |
| C    | -0.56183000 | -0.51750400 | -0.00030900 |
| H    | -0.45182400 | -1.16753800 | 0.87747800  |
| H    | -0.45227700 | -1.16695700 | -0.87857800 |
| C    | -1.94880800 | 0.11983300  | 0.00027900  |
| H    | -2.08717000 | 0.75291900  | -0.88264700 |
| H    | -2.74031900 | -0.63501800 | -0.00082600 |
| H    | -2.08746500 | 0.75071100  | 0.88473100  |
| H    | 2.08764500  | -0.75209500 | -0.88317100 |
| H    | 2.74039100  | 0.63488900  | 0.00028100  |

### Pre-9

|                                 |                     |
|---------------------------------|---------------------|
| M06-2X SCF energy:              | -1638.73470516 a.u. |
| M06-2X enthalpy:                | -1638.12955400 a.u. |
| M06-2X free energy:             | -1638.19820000 a.u. |
| M06-2X SCF energy in solution:  | -1639.13544842 a.u. |
| M06-2X enthalpy in solution:    | -1638.53029726 a.u. |
| M06-2X free energy in solution: | -1638.59894326 a.u. |

### Cartesian coordinates

| ATOM | X           | Y           | Z           |
|------|-------------|-------------|-------------|
| P    | 0.35079100  | -0.76587700 | -0.11191100 |
| C    | -0.18664800 | -1.95742600 | -1.38049300 |

|    |             |             |             |
|----|-------------|-------------|-------------|
| C  | -0.97544400 | -3.07977900 | -1.10898000 |
| C  | 0.10408200  | -1.62893300 | -2.71044500 |
| C  | -1.44714700 | -3.87380500 | -2.15185300 |
| H  | -1.21821800 | -3.34698100 | -0.08490000 |
| C  | -0.37123000 | -2.42089200 | -3.74937700 |
| H  | 0.71082800  | -0.75022300 | -2.91641900 |
| C  | -1.14447700 | -3.54654300 | -3.47013700 |
| H  | -2.05364200 | -4.74674000 | -1.93203100 |
| H  | -0.13765500 | -2.16109900 | -4.77703400 |
| H  | -1.51318800 | -4.16686000 | -4.28127600 |
| C  | 0.58154100  | -1.69401600 | 1.44074800  |
| C  | 0.42459900  | -0.95576800 | 2.61978100  |
| C  | 0.95642700  | -3.03918500 | 1.51475700  |
| C  | 0.65791700  | -1.55149700 | 3.85438100  |
| C  | 1.18801700  | -3.63315400 | 2.75289000  |
| H  | 1.06784100  | -3.62803400 | 0.60869900  |
| C  | 1.04368800  | -2.88900300 | 3.92115800  |
| H  | 0.53734000  | -0.97297800 | 4.76471200  |
| H  | 1.48169000  | -4.67686900 | 2.80382300  |
| H  | 1.22760900  | -3.35316200 | 4.88518000  |
| N  | 1.72813200  | -0.02278500 | -0.59804200 |
| N  | -0.70760300 | 0.43456200  | 0.05728800  |
| C  | -2.04070100 | 0.32012900  | 0.37183900  |
| C  | -2.84510800 | 1.50380200  | 0.15879800  |
| C  | -2.68749000 | -0.79041000 | 0.90087200  |
| C  | -4.23206900 | 1.50101100  | 0.45960100  |
| C  | -4.06844400 | -0.78037300 | 1.19266500  |
| H  | -2.11664800 | -1.68590400 | 1.12154300  |
| C  | -2.92138300 | 3.70483500  | -0.54193800 |
| C  | -4.95009200 | 2.69843500  | 0.22088600  |
| C  | -4.84121900 | 0.33135300  | 0.97970000  |
| H  | -4.51817500 | -1.68087400 | 1.60084100  |
| C  | -4.30466800 | 3.79968300  | -0.27811500 |
| H  | -2.37730600 | 4.56013200  | -0.93584000 |
| H  | -6.01438500 | 2.72564600  | 0.44112600  |
| H  | -5.90315000 | 0.33752500  | 1.20478500  |
| H  | -4.82863600 | 4.72923000  | -0.47003500 |
| N  | -2.22070500 | 2.61042200  | -0.33549100 |
| Li | -0.23571400 | 2.22253400  | -0.60487000 |
| C  | 3.11553000  | -0.53260400 | -0.58946000 |
| C  | 3.18794000  | -1.95177000 | -1.16057900 |
| H  | 4.22834700  | -2.29254400 | -1.16068500 |
| H  | 2.81181000  | -1.98300800 | -2.18716100 |
| H  | 2.61172000  | -2.66282200 | -0.56074000 |
| C  | 3.70668600  | -0.50939200 | 0.82743100  |
| H  | 3.60579100  | 0.49069200  | 1.25982800  |
| H  | 4.77077500  | -0.76877400 | 0.79729000  |
| H  | 3.20201500  | -1.22331000 | 1.48548300  |
| C  | 3.93206400  | 0.39628100  | -1.49282600 |
| H  | 4.96046000  | 0.02835400  | -1.56569000 |
| H  | 3.95562700  | 1.41421200  | -1.09335000 |
| H  | 3.49834300  | 0.43282600  | -2.49723400 |
| H  | 0.11856500  | 0.08562400  | 2.55613300  |
| C  | 1.61777500  | 2.94989600  | -1.12140800 |
| H  | 1.07452400  | 3.84274100  | -1.49944300 |
| H  | 1.60097500  | 1.03061600  | -0.76001300 |
| C  | 2.51084000  | 3.43348600  | 0.02826800  |
| H  | 1.88919400  | 3.88594800  | 0.81899300  |
| H  | 3.00222800  | 2.57724500  | 0.52459000  |
| C  | 3.60631900  | 4.43921700  | -0.34488000 |
| H  | 3.13682200  | 5.31623200  | -0.81018500 |
| H  | 4.24417200  | 3.99207200  | -1.12078900 |
| C  | 4.46396400  | 4.87346200  | 0.84247100  |
| H  | 4.95652200  | 4.00883500  | 1.30246400  |
| H  | 5.24268000  | 5.58612700  | 0.55179900  |
| H  | 3.84757500  | 5.34749600  | 1.61478000  |
| H  | 2.25645400  | 2.67155200  | -1.97678800 |

**TS9**

M06-2X SCF energy: -1638.73469072 a.u.  
M06-2X enthalpy: -1638.13123500 a.u.  
M06-2X free energy: -1638.19798800 a.u.  
M06-2X SCF energy in solution: -1639.13426088 a.u.  
M06-2X enthalpy in solution: -1638.53080516 a.u.  
M06-2X free energy in solution: -1638.59755816 a.u.  
Frequency: -117.56 cm<sup>-1</sup>

## Cartesian coordinates

| ATOM | X           | Y           | Z           |
|------|-------------|-------------|-------------|
| P    | 0.46073000  | -0.72902900 | -0.11197400 |
| C    | 0.02124800  | -1.97556800 | -1.36910900 |
| C    | -0.65288500 | -3.16789500 | -1.08760000 |
| C    | 0.26810500  | -1.62723700 | -2.70283400 |
| C    | -1.05445600 | -4.00822000 | -2.12368500 |
| H    | -0.85958700 | -3.45357700 | -0.06052800 |
| C    | -0.13763300 | -2.46506300 | -3.73525200 |
| H    | 0.78748100  | -0.69567000 | -2.91645600 |
| C    | -0.79639300 | -3.65891700 | -3.44571000 |
| H    | -1.57150000 | -4.93499100 | -1.89548600 |
| H    | 0.06162900  | -2.18846900 | -4.76580600 |
| H    | -1.11022600 | -4.31541300 | -4.25145500 |
| C    | 0.76735000  | -1.62553800 | 1.44763100  |
| C    | 0.53065900  | -0.90378800 | 2.62344400  |
| C    | 1.27331700  | -2.92662300 | 1.52977300  |
| C    | 0.81318500  | -1.46982800 | 3.86181900  |
| C    | 1.55407800  | -3.49147500 | 2.77139700  |
| H    | 1.44879500  | -3.50444100 | 0.62674400  |
| C    | 1.32880400  | -2.76232900 | 3.93630700  |
| H    | 0.62949300  | -0.90333000 | 4.76922100  |
| H    | 1.94923900  | -4.50091500 | 2.82756100  |
| H    | 1.55090400  | -3.20337400 | 4.90315900  |
| N    | 1.74469100  | 0.14943300  | -0.60077200 |
| N    | -0.72154800 | 0.35548600  | 0.05483100  |
| C    | -2.03469100 | 0.11788100  | 0.37256200  |
| C    | -2.94687100 | 1.21947300  | 0.14938200  |
| C    | -2.57506500 | -1.04313400 | 0.91379600  |
| C    | -4.32677100 | 1.09210500  | 0.45610900  |
| C    | -3.95009500 | -1.15709000 | 1.20990700  |
| H    | -1.92264000 | -1.87954000 | 1.13963600  |
| C    | -3.22947300 | 3.39610200  | -0.57676900 |
| C    | -5.15290400 | 2.21542200  | 0.20802600  |
| C    | -4.82346100 | -0.12352000 | 0.98991700  |
| H    | -4.31398700 | -2.09140500 | 1.62763700  |
| C    | -4.61401300 | 3.36610300  | -0.30614300 |
| H    | -2.76968000 | 4.29350500  | -0.98435200 |
| H    | -6.21435200 | 2.14678400  | 0.43294900  |
| H    | -5.88069400 | -0.21345200 | 1.21901200  |
| H    | -5.22243600 | 4.24102500  | -0.50556900 |
| N    | -2.42920700 | 2.37354900  | -0.36155400 |
| Li   | -0.42583900 | 2.13669000  | -0.64906800 |
| C    | 3.17039000  | -0.23639000 | -0.59949500 |
| C    | 3.37595700  | -1.64341600 | -1.17124800 |
| H    | 4.44355900  | -1.88698300 | -1.17472300 |
| H    | 3.00122200  | -1.70964600 | -2.19681000 |
| H    | 2.86905900  | -2.40496700 | -0.57076300 |
| C    | 3.76330700  | -0.16029800 | 0.81542800  |
| H    | 3.56920200  | 0.82508700  | 1.24995800  |
| H    | 4.84720800  | -0.31837600 | 0.78223200  |
| H    | 3.33036700  | -0.91886000 | 1.47458000  |
| C    | 3.90701600  | 0.75798700  | -1.50324900 |
| H    | 4.95956200  | 0.46850600  | -1.58648800 |
| H    | 3.85905200  | 1.77233900  | -1.09753900 |
| H    | 3.46391300  | 0.76807000  | -2.50417900 |
| H    | 0.12344600  | 0.10199400  | 2.55458300  |

|   |            |            |             |
|---|------------|------------|-------------|
| C | 1.38224700 | 2.95417800 | -1.18638600 |
| H | 0.65748600 | 3.70648000 | -1.57274200 |
| H | 1.49747200 | 1.22529800 | -0.82585600 |
| C | 2.10742900 | 3.60493800 | -0.00239700 |
| H | 1.37820800 | 3.88143800 | 0.77871400  |
| H | 2.76911100 | 2.87026600 | 0.48871300  |
| C | 2.94736200 | 4.84513700 | -0.32636200 |
| H | 2.30119100 | 5.59799000 | -0.79741600 |
| H | 3.69565200 | 4.57225000 | -1.08363500 |
| C | 3.64121000 | 5.44446100 | 0.89541500  |
| H | 4.30655800 | 4.71015600 | 1.36369100  |
| H | 4.24106800 | 6.32356500 | 0.63894500  |
| H | 2.90672400 | 5.74871000 | 1.64975600  |
| H | 2.08478700 | 2.84129500 | -2.02605600 |

**9A**

M06-2X SCF energy: -1480.42595619 a.u.  
M06-2X enthalpy: -1479.95852400 a.u.  
M06-2X free energy: -1480.01583700 a.u.  
M06-2X SCF energy in solution: -1480.77427182 a.u.  
M06-2X enthalpy in solution: -1480.30683963 a.u.  
M06-2X free energy in solution: -1480.36415263 a.u.

## Cartesian coordinates

| ATOM | X           | Y           | Z           |
|------|-------------|-------------|-------------|
| P    | -0.79407400 | 0.22167300  | -0.12453800 |
| C    | -0.50311100 | -0.89190800 | 1.29810400  |
| C    | -0.73231900 | -2.27033400 | 1.24289900  |
| C    | 0.09353600  | -0.34482200 | 2.43817400  |
| C    | -0.38735200 | -3.08452000 | 2.31862100  |
| H    | -1.18924900 | -2.70859700 | 0.35896500  |
| C    | 0.44170700  | -1.15875800 | 3.51196200  |
| H    | 0.27334600  | 0.72715600  | 2.47210600  |
| C    | 0.19794400  | -2.52914300 | 3.45387400  |
| H    | -0.57414900 | -4.15300900 | 2.26972700  |
| H    | 0.90056000  | -0.72447600 | 4.39502300  |
| H    | 0.46583300  | -3.16483900 | 4.29246200  |
| C    | -2.21760800 | -0.51134700 | -1.01010100 |
| C    | -2.22509900 | -0.41410600 | -2.40479400 |
| C    | -3.31888600 | -1.07553200 | -0.35758900 |
| C    | -3.32549100 | -0.85469000 | -3.13426800 |
| C    | -4.41725000 | -1.52062500 | -1.08846600 |
| H    | -3.31527200 | -1.18146700 | 0.72449000  |
| C    | -4.42391100 | -1.40439100 | -2.47678700 |
| H    | -3.32437300 | -0.77459000 | -4.21713100 |
| H    | -5.26670800 | -1.96002400 | -0.57440800 |
| H    | -5.28186300 | -1.74941300 | -3.04593500 |
| N    | -0.96004700 | 1.76878500  | 0.27984300  |
| N    | 0.50390100  | 0.23516600  | -1.09050100 |
| C    | 1.67850700  | -0.46080500 | -0.97734200 |
| C    | 2.88932100  | 0.31060500  | -0.80043900 |
| C    | 1.81684100  | -1.83888100 | -1.06695200 |
| C    | 4.15703800  | -0.33135700 | -0.76060200 |
| C    | 3.07769100  | -2.46760700 | -1.00496200 |
| H    | 0.92144200  | -2.43545000 | -1.21273400 |
| C    | 3.85527200  | 2.39040600  | -0.49674900 |
| C    | 5.29923700  | 0.48958700  | -0.59841300 |
| C    | 4.23466400  | -1.74212900 | -0.86642500 |
| H    | 3.12644900  | -3.55002900 | -1.08205900 |
| C    | 5.15698500  | 1.84684500  | -0.46994600 |
| H    | 3.71344100  | 3.46265800  | -0.37905200 |
| H    | 6.28225900  | 0.02560900  | -0.57414400 |
| H    | 5.20640500  | -2.22511400 | -0.83024100 |
| H    | 6.01221300  | 2.50086800  | -0.34223300 |
| N    | 2.76675800  | 1.66622400  | -0.65495300 |
| Li   | 0.75248300  | 2.12224600  | -0.61514800 |
| C    | -2.11080500 | 2.46410000  | 0.85120200  |

|   |             |            |             |
|---|-------------|------------|-------------|
| C | -2.71881000 | 1.73356600 | 2.05722200  |
| H | -3.54914300 | 2.30908400 | 2.48177500  |
| H | -1.96817300 | 1.58102300 | 2.83892500  |
| H | -3.10943600 | 0.75251100 | 1.76630500  |
| C | -3.20226500 | 2.69086500 | -0.20740600 |
| H | -2.77252200 | 3.19397500 | -1.08006700 |
| H | -4.01299600 | 3.31277700 | 0.19061000  |
| H | -3.63372300 | 1.74202100 | -0.54106600 |
| C | -1.59650700 | 3.82920500 | 1.32420100  |
| H | -2.40002900 | 4.42690100 | 1.76856100  |
| H | -1.18165100 | 4.38848200 | 0.47731500  |
| H | -0.80536800 | 3.69415900 | 2.06986600  |
| H | -1.35392300 | 0.00139000 | -2.90437500 |

### THF (Tetrahydrofuran)

|                                 |                    |
|---------------------------------|--------------------|
| M06-2X SCF energy:              | -232.33665781 a.u. |
| M06-2X enthalpy:                | -232.21379900 a.u. |
| M06-2X free energy:             | -232.23895500 a.u. |
| M06-2X SCF energy in solution:  | -232.41346990 a.u. |
| M06-2X enthalpy in solution:    | -232.29061109 a.u. |
| M06-2X free energy in solution: | -232.31576709 a.u. |

#### Cartesian coordinates

| ATOM | X           | Y           | Z           |
|------|-------------|-------------|-------------|
| H    | 1.51204100  | -0.46753200 | 1.17676800  |
| O    | -0.00010000 | -1.24273400 | -0.00022000 |
| C    | -1.15814700 | -0.42794300 | -0.13664500 |
| C    | 1.15799300  | -0.42816300 | 0.13692400  |
| C    | -0.72761300 | 0.99070700  | 0.23643900  |
| H    | -1.51283900 | -0.46742500 | -1.17625300 |
| H    | -1.94631400 | -0.82504900 | 0.51026500  |
| C    | 0.72788000  | 0.99048100  | -0.23656600 |
| H    | 1.94647000  | -0.82552600 | -0.50943800 |
| H    | -0.77136400 | 1.12876600  | 1.32200800  |
| H    | -1.34345400 | 1.76009900  | -0.23477900 |
| H    | 1.34389100  | 1.75985900  | 0.23445500  |
| H    | 0.77169400  | 1.12818800  | -1.32217800 |

### 9B

|                                 |                     |
|---------------------------------|---------------------|
| M06-2X SCF energy:              | -1712.79631523 a.u. |
| M06-2X enthalpy:                | -1712.20417200 a.u. |
| M06-2X free energy:             | -1712.27156400 a.u. |
| M06-2X SCF energy in solution:  | -1713.21209329 a.u. |
| M06-2X enthalpy in solution:    | -1712.61995006 a.u. |
| M06-2X free energy in solution: | -1712.68734206 a.u. |

#### Cartesian coordinates

| ATOM | X           | Y           | Z           |
|------|-------------|-------------|-------------|
| P    | 0.79350200  | 0.42033200  | 0.13044500  |
| C    | 0.37657700  | 2.20215600  | 0.17228000  |
| C    | 0.74526500  | 3.10145700  | -0.83185900 |
| C    | -0.47507200 | 2.63252400  | 1.19524400  |
| C    | 0.28908700  | 4.41738000  | -0.79945700 |
| H    | 1.39138600  | 2.77399000  | -1.64235500 |
| C    | -0.93522900 | 3.94495600  | 1.22463500  |
| H    | -0.76849400 | 1.92441200  | 1.96726600  |
| C    | -0.54888900 | 4.84012700  | 0.22892300  |
| H    | 0.58612200  | 5.11179300  | -1.57968800 |
| H    | -1.59439100 | 4.27091700  | 2.02351600  |
| H    | -0.90453100 | 5.86587800  | 0.25261500  |
| C    | 2.31788400  | 0.32481900  | -0.88682800 |
| C    | 2.40699800  | -0.68569200 | -1.84825000 |
| C    | 3.41665400  | 1.16729900  | -0.68491800 |
| C    | 3.58061900  | -0.87021600 | -2.57510600 |
| C    | 4.58735700  | 0.98978200  | -1.41700300 |
| H    | 3.35521900  | 1.97687000  | 0.03869400  |
| C    | 4.67365200  | -0.03504500 | -2.35755100 |

|    |             |             |             |
|----|-------------|-------------|-------------|
| H  | 3.63844000  | -1.65876700 | -3.32008100 |
| H  | 5.43218000  | 1.65233500  | -1.25481200 |
| H  | 5.58806200  | -0.17467900 | -2.92621800 |
| N  | 0.89987200  | -0.27153300 | 1.57047300  |
| N  | -0.37527000 | -0.39623500 | -0.63815000 |
| C  | -1.58493600 | 0.13315000  | -1.02997800 |
| C  | -2.77109600 | -0.21995900 | -0.28360400 |
| C  | -1.75966300 | 0.96462000  | -2.12750700 |
| C  | -4.05025000 | 0.25402400  | -0.68716400 |
| C  | -3.02956100 | 1.44178900  | -2.51294100 |
| H  | -0.87915300 | 1.24075800  | -2.70031500 |
| C  | -3.67900100 | -1.33825200 | 1.52576600  |
| C  | -5.16678900 | -0.13672400 | 0.09222200  |
| C  | -4.16340400 | 1.09460600  | -1.82140100 |
| H  | -3.10409500 | 2.09201300  | -3.37993500 |
| C  | -4.99016200 | -0.93009400 | 1.19559600  |
| H  | -3.50611600 | -1.96300900 | 2.39978600  |
| H  | -6.15713800 | 0.20600300  | -0.19778700 |
| H  | -5.14312500 | 1.45517000  | -2.12037800 |
| H  | -5.82485300 | -1.24300300 | 1.81294200  |
| N  | -2.61622100 | -1.00446400 | 0.82557000  |
| Li | -0.61221000 | -1.46806300 | 1.08220600  |
| C  | 1.88294300  | -0.13288000 | 2.63939700  |
| C  | 2.22542700  | 1.32876100  | 2.96141900  |
| H  | 2.93163800  | 1.38710600  | 3.79745300  |
| H  | 1.32391200  | 1.88777400  | 3.23019600  |
| H  | 2.68408500  | 1.82863600  | 2.10105700  |
| C  | 3.17692200  | -0.89679300 | 2.31347200  |
| H  | 2.94872800  | -1.95077000 | 2.12301900  |
| H  | 3.88553500  | -0.84446300 | 3.14869500  |
| H  | 3.66642200  | -0.48754800 | 1.42430600  |
| C  | 1.24931200  | -0.76617400 | 3.88498600  |
| H  | 1.93006000  | -0.73185200 | 4.74316200  |
| H  | 0.99872400  | -1.81423100 | 3.68216500  |
| H  | 0.32658300  | -0.23647500 | 4.14592400  |
| H  | 1.53492200  | -1.31019900 | -2.02584500 |
| O  | -0.28692200 | -3.34817300 | 0.66524000  |
| C  | 1.09104600  | -3.52276500 | 0.27120900  |
| C  | -1.14847200 | -3.80691900 | -0.38707800 |
| C  | 1.06507900  | -4.12625500 | -1.13629600 |
| H  | 1.56703800  | -2.53717000 | 0.28663900  |
| H  | 1.58192400  | -4.16714000 | 1.00682000  |
| C  | -0.31222000 | -3.69980800 | -1.65385000 |
| H  | -1.44149400 | -4.84535600 | -0.18228200 |
| H  | -2.03742700 | -3.17226500 | -0.38770200 |
| H  | 1.13165800  | -5.21834600 | -1.09214500 |
| H  | 1.89284000  | -3.75869700 | -1.74838900 |
| H  | -0.68561700 | -4.33324000 | -2.46183700 |
| H  | -0.29870100 | -2.65539300 | -1.98109800 |

### 9C

|                                 |                     |
|---------------------------------|---------------------|
| M06-2X SCF energy:              | -1945.15001498 a.u. |
| M06-2X enthalpy:                | -1944.43327700 a.u. |
| M06-2X free energy:             | -1944.50957200 a.u. |
| M06-2X SCF energy in solution:  | -1945.63664832 a.u. |
| M06-2X enthalpy in solution:    | -1944.91991034 a.u. |
| M06-2X free energy in solution: | -1944.99620534 a.u. |

#### Cartesian coordinates

| ATOM | X           | Y           | Z          |
|------|-------------|-------------|------------|
| P    | 0.00585800  | 0.26214000  | 0.70008500 |
| C    | -0.61197600 | -0.98039000 | 1.90948500 |
| C    | -1.85196200 | -0.94405400 | 2.55082400 |
| C    | 0.24578400  | -2.05628000 | 2.16495400 |
| C    | -2.22190200 | -1.95791800 | 3.43145900 |
| H    | -2.53145500 | -0.12225900 | 2.35470300 |
| C    | -0.12714000 | -3.07882400 | 3.03152100 |

|    |             |             |             |
|----|-------------|-------------|-------------|
| H  | 1.22316800  | -2.06267400 | 1.68778800  |
| C  | -1.36485800 | -3.02933100 | 3.66932200  |
| H  | -3.18658100 | -1.91353200 | 3.92820400  |
| H  | 0.55167800  | -3.90616800 | 3.22004000  |
| H  | -1.65845200 | -3.82067500 | 4.35254100  |
| C  | -0.93475900 | 1.80775700  | 1.01154400  |
| C  | -1.24153600 | 2.60279900  | -0.09803100 |
| C  | -1.27744800 | 2.26982400  | 2.28459800  |
| C  | -1.85162000 | 3.84140900  | 0.06152200  |
| C  | -1.89580600 | 3.50925800  | 2.44648100  |
| H  | -1.07777300 | 1.65928900  | 3.16057100  |
| C  | -2.17667400 | 4.30052700  | 1.33720900  |
| H  | -2.08518300 | 4.44532700  | -0.81042000 |
| H  | -2.15802100 | 3.85371200  | 3.44239800  |
| H  | -2.65530000 | 5.26686600  | 1.46399800  |
| N  | 1.60600200  | 0.42370500  | 0.81746800  |
| N  | -0.12701300 | -0.24029700 | -0.83848200 |
| C  | -1.12968200 | -0.69322300 | -1.64292300 |
| C  | -2.54228300 | -0.61807100 | -1.34493500 |
| C  | -0.78308300 | -1.23760700 | -2.88399800 |
| C  | -3.50391500 | -1.07544900 | -2.29326000 |
| C  | -1.74343200 | -1.69275800 | -3.80382000 |
| H  | 0.27555700  | -1.29976900 | -3.12874200 |
| C  | -4.18060700 | 0.02780700  | 0.13303500  |
| C  | -4.87081500 | -0.94375500 | -1.93806700 |
| C  | -3.08858300 | -1.62175100 | -3.53000200 |
| H  | -1.40481100 | -2.10607300 | -4.75015800 |
| C  | -5.21664800 | -0.38955900 | -0.73468800 |
| H  | -4.42485000 | 0.47262800  | 1.09802100  |
| H  | -5.62997700 | -1.28424600 | -2.63824500 |
| H  | -3.83396900 | -1.96789400 | -4.23965700 |
| H  | -6.25401000 | -0.26930300 | -0.44068200 |
| N  | -2.90634900 | -0.08713300 | -0.15236400 |
| Li | 1.84635100  | -0.23268600 | -1.03992100 |
| C  | 2.38532100  | 1.05267800  | 1.87797900  |
| C  | 1.89379400  | 0.74304800  | 3.30138000  |
| H  | 2.55367600  | 1.20738600  | 4.04303200  |
| H  | 1.87561600  | -0.33595700 | 3.48216400  |
| H  | 0.88498600  | 1.13013900  | 3.46932100  |
| C  | 2.43372400  | 2.57821600  | 1.68271500  |
| H  | 2.83878700  | 2.80700900  | 0.68972600  |
| H  | 3.06900000  | 3.06089200  | 2.43548000  |
| H  | 1.43075600  | 3.01289600  | 1.74770200  |
| C  | 3.81560800  | 0.50633600  | 1.76696300  |
| H  | 4.47804000  | 0.96617600  | 2.50918900  |
| H  | 4.22724400  | 0.70728500  | 0.77172200  |
| H  | 3.81671900  | -0.57783800 | 1.92424900  |
| H  | -1.01633900 | 2.22568800  | -1.09271500 |
| O  | 2.45166700  | 0.94582100  | -2.48367500 |
| C  | 3.59435300  | 1.75480700  | -2.15966800 |
| C  | 1.39270000  | 1.79901500  | -2.94320700 |
| C  | 3.13374000  | 3.21943400  | -2.23300700 |
| H  | 3.91316800  | 1.48080800  | -1.14896800 |
| H  | 4.40300300  | 1.52914400  | -2.86187500 |
| C  | 1.60838600  | 3.09108800  | -2.17096700 |
| H  | 1.49847200  | 1.95467800  | -4.02559600 |
| H  | 0.45110700  | 1.28762800  | -2.73364600 |
| H  | 3.43940300  | 3.67073200  | -3.18220100 |
| H  | 3.54818600  | 3.82191500  | -1.42137300 |
| H  | 1.08297600  | 3.94595800  | -2.60387200 |
| H  | 1.27778200  | 2.95335900  | -1.13553000 |
| O  | 2.47036800  | -2.04300700 | -1.38025300 |
| C  | 1.54544300  | -3.11234500 | -1.09983000 |
| C  | 3.76438100  | -2.40147700 | -0.90199600 |
| C  | 2.26563800  | -4.06849000 | -0.13219900 |
| H  | 0.65126500  | -2.65447400 | -0.66943700 |
| H  | 1.27576800  | -3.60004500 | -2.04155400 |

|   |            |             |             |
|---|------------|-------------|-------------|
| C | 3.49235000 | -3.26533700 | 0.32167300  |
| H | 4.30560600 | -2.96102600 | -1.67748400 |
| H | 4.30664500 | -1.47683200 | -0.68334500 |
| H | 2.58114000 | -4.97817200 | -0.65162000 |
| H | 1.62033300 | -4.36199300 | 0.69959500  |
| H | 4.34154700 | -3.89479100 | 0.59732200  |
| H | 3.24446700 | -2.62058600 | 1.17051400  |

## 9D

M06-2X SCF energy: -1945.15454518 a.u.  
M06-2X enthalpy: -1944.43791300 a.u.  
M06-2X free energy: -1944.51488100 a.u.  
M06-2X SCF energy in solution: -1945.64122912 a.u.  
M06-2X enthalpy in solution: -1944.92459694 a.u.  
M06-2X free energy in solution: -1945.00156494 a.u.

## Cartesian coordinates

| ATOM | X           | Y           | Z           |
|------|-------------|-------------|-------------|
| P    | 1.44628900  | 0.00059400  | -0.12149900 |
| C    | 2.14991400  | -1.66805000 | -0.44544000 |
| C    | 2.85854300  | -2.42587700 | 0.49165900  |
| C    | 1.87181700  | -2.22946700 | -1.69738400 |
| C    | 3.28073300  | -3.71747000 | 0.18342100  |
| H    | 3.09898400  | -2.00352800 | 1.46397600  |
| C    | 2.28777800  | -3.52070700 | -2.00487200 |
| H    | 1.33326800  | -1.62825900 | -2.42714300 |
| C    | 2.99400100  | -4.26708600 | -1.06303700 |
| H    | 3.83495900  | -4.29380000 | 0.91813700  |
| H    | 2.06855800  | -3.94319100 | -2.98120300 |
| H    | 3.32394900  | -5.27365900 | -1.30217200 |
| C    | 2.53595100  | 0.69760600  | 1.18170400  |
| C    | 1.93823900  | 1.42757500  | 2.21402400  |
| C    | 3.93129000  | 0.59598500  | 1.14150200  |
| C    | 2.72045800  | 2.05797500  | 3.17830600  |
| C    | 4.71364600  | 1.22787700  | 2.10377800  |
| H    | 4.41026300  | 0.00875200  | 0.36180800  |
| C    | 4.10851500  | 1.96329500  | 3.12114100  |
| H    | 2.24603600  | 2.61796400  | 3.97857900  |
| H    | 5.79536300  | 1.14359000  | 2.06200200  |
| H    | 4.71899900  | 2.45527500  | 3.87235700  |
| N    | 1.23627200  | 0.85545600  | -1.44571400 |
| N    | -0.07798000 | -0.10793600 | 0.42393600  |
| C    | -0.64567300 | -0.79009300 | 1.44267200  |
| C    | -2.09856300 | -0.73276400 | 1.52342500  |
| C    | 0.01142000  | -1.52530000 | 2.43262100  |
| C    | -2.78403800 | -1.44710700 | 2.54920300  |
| C    | -0.68904900 | -2.21842400 | 3.43588000  |
| H    | 1.09548300  | -1.56086500 | 2.42499900  |
| C    | -4.07458200 | 0.09294000  | 0.68010800  |
| C    | -4.19820700 | -1.35914500 | 2.57038600  |
| C    | -2.06083700 | -2.20045300 | 3.50525400  |
| H    | -0.12040200 | -2.78109800 | 4.17148500  |
| C    | -4.85033900 | -0.59092500 | 1.64279500  |
| H    | -4.57482200 | 0.71988200  | -0.05907000 |
| H    | -4.74712400 | -1.90158500 | 3.33653100  |
| H    | -2.59947000 | -2.73970200 | 4.27840000  |
| H    | -5.93107400 | -0.49641300 | 1.63720500  |
| N    | -2.76226800 | 0.02690800  | 0.60537400  |
| Li   | -0.81399400 | 0.74894800  | -1.21874900 |
| C    | 2.18527600  | 1.55552300  | -2.29635300 |
| C    | 3.44076300  | 0.73566400  | -2.62955700 |
| H    | 4.10059600  | 1.29226300  | -3.30500100 |
| H    | 3.17331600  | -0.20998100 | -3.11080900 |
| H    | 4.01132000  | 0.50449900  | -1.72305500 |
| C    | 2.60952100  | 2.88506800  | -1.65093500 |
| H    | 1.72061600  | 3.49155000  | -1.44645500 |
| H    | 3.27509900  | 3.45551900  | -2.31022100 |

|   |             |             |             |
|---|-------------|-------------|-------------|
| H | 3.13204800  | 2.70922400  | -0.70426700 |
| C | 1.44143300  | 1.86004400  | -3.60323800 |
| H | 2.07160000  | 2.42341400  | -4.30112300 |
| H | 0.54232400  | 2.44767300  | -3.38671500 |
| H | 1.13100200  | 0.92486100  | -4.08223200 |
| H | 0.85376500  | 1.48429200  | 2.26018700  |
| O | -1.46391500 | 2.58160600  | -0.93500000 |
| C | -0.97430100 | 2.98129900  | 0.35727200  |
| C | -2.80761300 | 3.04624100  | -1.10305100 |
| C | -1.79695800 | 4.21139700  | 0.70899000  |
| H | -1.15311300 | 2.16507900  | 1.06771700  |
| H | 0.10148300  | 3.14515500  | 0.26224200  |
| C | -3.17250300 | 3.78953200  | 0.18496100  |
| H | -2.82968600 | 3.70681000  | -1.97706000 |
| H | -3.46200700 | 2.19025500  | -1.29243500 |
| H | -1.42804400 | 5.08933200  | 0.16802200  |
| H | -1.79176100 | 4.42936500  | 1.77923900  |
| H | -3.85334700 | 4.62474900  | 0.00583000  |
| H | -3.64239200 | 3.10057800  | 0.89505400  |
| O | -1.73687400 | -0.60150000 | -2.35599900 |
| C | -3.07877700 | -0.37908200 | -2.79935200 |
| C | -1.58925800 | -1.95782900 | -1.89123500 |
| C | -3.72676500 | -1.75826200 | -2.88914700 |
| H | -3.59572000 | 0.23851200  | -2.05580000 |
| H | -3.04422600 | 0.15737100  | -3.75161200 |
| C | -3.00633100 | -2.50561300 | -1.76405500 |
| H | -1.01255800 | -2.51643800 | -2.63879500 |
| H | -1.03339600 | -1.93484200 | -0.95163700 |
| H | -3.50802500 | -2.22161300 | -3.85703100 |
| H | -4.81113900 | -1.71621200 | -2.76215700 |
| H | -3.04089400 | -3.59185400 | -1.87346000 |
| H | -3.43106800 | -2.23674000 | -0.79143400 |

## 9E

|                                 |                     |
|---------------------------------|---------------------|
| M06-2X SCF energy:              | -1945.15822807 a.u. |
| M06-2X enthalpy:                | -1944.44122800 a.u. |
| M06-2X free energy:             | -1944.51589600 a.u. |
| M06-2X SCF energy in solution:  | -1945.64437468 a.u. |
| M06-2X enthalpy in solution:    | -1944.92737461 a.u. |
| M06-2X free energy in solution: | -1945.00204261 a.u. |

## Cartesian coordinates

| ATOM | X           | Y           | Z           |
|------|-------------|-------------|-------------|
| P    | -1.07390400 | -0.23963700 | 0.13767700  |
| C    | -1.43154300 | -1.09047900 | 1.73986500  |
| C    | -1.87088100 | -2.41178200 | 1.86730200  |
| C    | -1.16296200 | -0.36463000 | 2.90599300  |
| C    | -2.04047600 | -2.98774300 | 3.12547000  |
| H    | -2.09581200 | -3.00023100 | 0.98248400  |
| C    | -1.32554900 | -0.93638800 | 4.16292600  |
| H    | -0.83579100 | 0.66637100  | 2.81144800  |
| C    | -1.76705700 | -2.25345100 | 4.27498900  |
| H    | -2.38652200 | -4.01399200 | 3.20472800  |
| H    | -1.11634000 | -0.35353400 | 5.05555500  |
| H    | -1.89967200 | -2.70363200 | 5.25415900  |
| C    | -2.01759500 | -1.24801200 | -1.08783700 |
| C    | -1.38529600 | -1.57499700 | -2.29183000 |
| C    | -3.34644200 | -1.64767000 | -0.89978100 |
| C    | -2.06952600 | -2.25861300 | -3.29421600 |
| C    | -4.03209600 | -2.33299600 | -1.89848000 |
| H    | -3.85148800 | -1.43227000 | 0.03832000  |
| C    | -3.39585200 | -2.63408600 | -3.10125400 |
| H    | -1.56293400 | -2.50547900 | -4.22250000 |
| H    | -5.06280200 | -2.63403000 | -1.73700600 |
| H    | -3.93084300 | -3.16805500 | -3.88081000 |
| N    | -1.34199800 | 1.32953800  | 0.15789800  |
| N    | 0.51313500  | -0.39459100 | -0.18607800 |

|    |             |             |             |
|----|-------------|-------------|-------------|
| C  | 1.29742800  | -1.50766500 | -0.18675400 |
| C  | 2.72515900  | -1.26028700 | -0.28157100 |
| C  | 0.90455400  | -2.84554000 | -0.14294400 |
| C  | 3.65802800  | -2.33106800 | -0.30393300 |
| C  | 1.84390300  | -3.89656300 | -0.16238500 |
| H  | -0.15031100 | -3.08988900 | -0.10498100 |
| C  | 4.40362800  | 0.32011800  | -0.43385500 |
| C  | 5.02973400  | -1.98781000 | -0.39399300 |
| C  | 3.19581500  | -3.66875400 | -0.23832200 |
| H  | 1.47416200  | -4.91754500 | -0.11957200 |
| C  | 5.40906100  | -0.67123000 | -0.45762600 |
| H  | 4.66270200  | 1.37600100  | -0.48413400 |
| H  | 5.77022900  | -2.78395900 | -0.41228000 |
| H  | 3.91131700  | -4.48505100 | -0.25317300 |
| H  | 6.45247400  | -0.38338000 | -0.52680100 |
| N  | 3.12129800  | 0.04001500  | -0.35067400 |
| Li | 1.46810000  | 1.30879700  | -0.32058800 |
| C  | -2.64103500 | 2.00168300  | 0.15549100  |
| C  | -3.61881500 | 1.45820200  | 1.21066100  |
| H  | -4.55598800 | 2.02680300  | 1.20633800  |
| H  | -3.17742300 | 1.52497800  | 2.21080900  |
| H  | -3.86498300 | 0.40739300  | 1.02799600  |
| C  | -3.30136000 | 1.94346600  | -1.23382800 |
| H  | -2.61045400 | 2.34764300  | -1.98289000 |
| H  | -4.22407700 | 2.53585700  | -1.26027400 |
| H  | -3.54677100 | 0.91732500  | -1.52093600 |
| C  | -2.40088500 | 3.48292300  | 0.48562300  |
| H  | -3.34552300 | 4.03854300  | 0.48333400  |
| H  | -1.73772500 | 3.94403700  | -0.25368600 |
| H  | -1.94323200 | 3.59095900  | 1.47370700  |
| H  | -0.34297500 | -1.29956700 | -2.43048500 |
| O  | 1.49847300  | 2.18777200  | -2.04247900 |
| C  | 0.49896100  | 3.21323800  | -2.20142300 |
| C  | 1.34725000  | 1.19472100  | -3.07241000 |
| C  | -0.13510700 | 2.96414400  | -3.56629500 |
| H  | -0.23997200 | 3.08092600  | -1.40317900 |
| H  | 0.99016600  | 4.18581900  | -2.10908200 |
| C  | -0.03801900 | 1.44012900  | -3.65740600 |
| H  | 2.13514500  | 1.34481300  | -3.82105400 |
| H  | 1.46966400  | 0.21114500  | -2.60978400 |
| H  | 0.45129400  | 3.43719400  | -4.36157800 |
| H  | -1.16002700 | 3.33916600  | -3.61984200 |
| H  | -0.14534500 | 1.04845300  | -4.67186600 |
| H  | -0.79902900 | 0.98339800  | -3.01456200 |
| O  | 1.94897900  | 2.38570200  | 1.20750500  |
| C  | 2.08374400  | 1.48991800  | 2.32983500  |
| C  | 1.17055800  | 3.53198200  | 1.57099600  |
| C  | 1.49559000  | 2.23366200  | 3.52826500  |
| H  | 1.52582700  | 0.57321800  | 2.10216200  |
| H  | 3.14217400  | 1.24173000  | 2.44299600  |
| C  | 0.46433900  | 3.15034800  | 2.86450700  |
| H  | 1.84474300  | 4.38657500  | 1.71030800  |
| H  | 0.47523700  | 3.74353100  | 0.75435500  |
| H  | 2.26545300  | 2.82747000  | 4.03200600  |
| H  | 1.05851900  | 1.54750400  | 4.25870800  |
| H  | 0.19368300  | 4.01749000  | 3.47173300  |
| H  | -0.44268000 | 2.59330500  | 2.61302600  |

## Dimer-A

|                                 |                     |
|---------------------------------|---------------------|
| M06-2X SCF energy:              | -2960.92407992 a.u. |
| M06-2X enthalpy:                | -2959.98714800 a.u. |
| M06-2X free energy:             | -2960.07964400 a.u. |
| M06-2X SCF energy in solution:  | -2961.60441956 a.u. |
| M06-2X enthalpy in solution:    | -2960.66748764 a.u. |
| M06-2X free energy in solution: | -2960.75998364 a.u. |

## Cartesian coordinates

| ATOM | X           | Y           | Z           |
|------|-------------|-------------|-------------|
| Li   | -0.39709200 | -0.17046400 | -1.27889600 |
| N    | -1.98374400 | -1.37265200 | -1.26457100 |
| N    | -1.46120900 | 0.35151900  | 0.59180800  |
| P    | -2.57948600 | -0.71922600 | 0.06882300  |
| C    | -2.33985800 | -2.64345500 | -1.90746500 |
| C    | -1.55157300 | 1.72457000  | 0.74877400  |
| C    | -2.86542400 | -1.92570200 | 1.42506000  |
| C    | -4.21431900 | 0.07848600  | -0.12899400 |
| C    | -3.84487500 | -2.95568300 | -1.90517700 |
| C    | -1.61004100 | -3.81847200 | -1.23456300 |
| C    | -1.88308200 | -2.52923700 | -3.36754900 |
| C    | -0.58538700 | 2.34598400  | 1.63298000  |
| C    | -2.40972600 | 2.59180300  | 0.07719500  |
| C    | -4.12029400 | -2.46917600 | 1.71463900  |
| C    | -1.75103700 | -2.40496100 | 2.12124500  |
| C    | -4.70574800 | 0.32343700  | -1.41241200 |
| C    | -4.90486100 | 0.58032700  | 0.97887000  |
| H    | -4.03051700 | -3.91461300 | -2.40199700 |
| H    | -4.41573100 | -2.18728100 | -2.43352400 |
| H    | -4.23224700 | -3.03393800 | -0.88405300 |
| H    | -0.53218500 | -3.63339300 | -1.19078900 |
| H    | -1.77873200 | -4.75137700 | -1.78610300 |
| H    | -1.96868400 | -3.96182800 | -0.20955600 |
| H    | -2.05713600 | -3.46332000 | -3.91424100 |
| H    | -0.81611300 | -2.28701700 | -3.42169000 |
| H    | -2.43052800 | -1.72329100 | -3.86920200 |
| C    | -0.54771200 | 3.75760600  | 1.80186400  |
| N    | 0.31263900  | 1.53771300  | 2.26186700  |
| C    | -2.36993700 | 3.98836900  | 0.26513200  |
| H    | -3.11446400 | 2.19693100  | -0.64257800 |
| C    | -4.25566500 | -3.46565100 | 2.68037700  |
| H    | -5.00089000 | -2.11605200 | 1.18499500  |
| C    | -1.88037700 | -3.40491600 | 3.07835700  |
| H    | -0.76322200 | -2.01283200 | 1.89328300  |
| C    | -5.88274200 | 1.04692500  | -1.58955300 |
| H    | -4.13868800 | -0.03570900 | -2.26733800 |
| C    | -6.07948000 | 1.30496800  | 0.80305000  |
| H    | -4.51419700 | 0.41237400  | 1.98004300  |
| C    | 0.44712300  | 4.28480300  | 2.66158300  |
| C    | -1.46777300 | 4.58023600  | 1.11086700  |
| C    | 1.22957600  | 2.06285900  | 3.04232500  |
| H    | -3.06872800 | 4.60071800  | -0.29842900 |
| C    | -3.13792100 | -3.93600700 | 3.36201200  |
| H    | -5.23776200 | -3.87560400 | 2.89561000  |
| H    | -0.99944000 | -3.77265000 | 3.59700500  |
| C    | -6.56970800 | 1.53677100  | -0.48130500 |
| H    | -6.26097000 | 1.23267400  | -2.59031400 |
| H    | -6.60914300 | 1.69569300  | 1.66636500  |
| C    | 1.33469200  | 3.44939500  | 3.28698900  |
| H    | 0.49571300  | 5.36169900  | 2.80488600  |
| H    | -1.42843600 | 5.65719900  | 1.24411500  |
| H    | 1.92911900  | 1.36328400  | 3.49662600  |
| H    | -3.24356500 | -4.71606500 | 4.10970400  |
| H    | -7.48546400 | 2.10419800  | -0.61736700 |
| H    | 2.11005000  | 3.82785400  | 3.94401500  |
| Li   | 0.39791600  | -0.16905200 | 1.27654400  |
| N    | 1.98591700  | -1.36925700 | 1.26529500  |
| N    | 1.46190500  | 0.35135200  | -0.59444400 |
| P    | 2.58071400  | -0.71801400 | -0.06955400 |
| C    | 2.34172900  | -2.63929300 | 1.90984300  |
| C    | 1.55060100  | 1.72467700  | -0.74979200 |
| C    | 4.21531800  | 0.08078700  | 0.12575400  |
| C    | 2.86623200  | -1.92685600 | -1.42369200 |
| C    | 3.84653000  | -2.95254900 | 1.90658600  |
| C    | 1.61041700  | -3.81477400 | 1.23939600  |
| C    | 1.88623100  | -2.52258800 | 3.37012500  |

|   |             |             |             |
|---|-------------|-------------|-------------|
| C | 0.58366000  | 2.34594600  | -1.63330000 |
| C | 2.40787200  | 2.59217700  | -0.07739900 |
| C | 4.90374400  | 0.58283500  | -0.98334200 |
| C | 4.70880800  | 0.32607900  | 1.40830000  |
| C | 1.75127800  | -2.40954700 | -2.11661200 |
| C | 4.12149200  | -2.46865000 | -1.71463700 |
| H | 4.03199100  | -3.91105200 | 2.40429700  |
| H | 4.41837600  | -2.18395600 | 2.43359100  |
| H | 4.23293100  | -3.03216900 | 0.88518500  |
| H | 0.53273800  | -3.62857700 | 1.19578400  |
| H | 1.77836700  | -4.74685400 | 1.79255300  |
| H | 1.96846900  | -3.96036600 | 0.21450500  |
| H | 2.06045300  | -3.45584900 | 3.91816200  |
| H | 0.81935200  | -2.27999500 | 3.42471700  |
| H | 2.43431200  | -1.71599700 | 3.87003700  |
| C | 0.54451900  | 3.75770800  | -1.80076200 |
| N | -0.31362200 | 1.53739200  | -2.26290300 |
| C | 2.36658400  | 3.98887500  | -0.26390700 |
| H | 3.11311200  | 2.19731500  | 0.64189300  |
| C | 6.07838300  | 1.30793100  | -0.80960200 |
| H | 4.51140700  | 0.41463400  | -1.98382500 |
| C | 5.88584600  | 1.05002200  | 1.58335600  |
| H | 4.14327000  | -0.03305100 | 2.26423600  |
| C | 1.88056600  | -3.41103400 | -3.07212000 |
| H | 0.76314900  | -2.01909400 | -1.88700400 |
| C | 4.25676000  | -3.46667800 | -2.67880200 |
| H | 5.00244000  | -2.11311000 | -1.18721500 |
| C | -0.45089900 | 4.28477100  | -2.65989500 |
| C | 1.46374100  | 4.58062500  | -1.10900700 |
| C | -1.23113800 | 2.06242700  | -3.04276200 |
| H | 3.06474800  | 4.60140000  | 0.30023600  |
| C | 6.57073900  | 1.54000400  | 0.47389800  |
| H | 6.60639600  | 1.69881400  | -1.67385600 |
| H | 6.26568400  | 1.23604800  | 2.58345500  |
| C | 3.13854100  | -3.94028600 | -3.35736500 |
| H | 0.99927300  | -3.78150100 | -3.58821000 |
| H | 5.23916000  | -3.87530800 | -2.89516200 |
| C | -1.33766500 | 3.44909800  | -3.28606500 |
| H | -0.50057300 | 5.36176100  | -2.80210900 |
| H | 1.42321800  | 5.65767800  | -1.24115700 |
| H | -1.92999700 | 1.36263900  | -3.49778800 |
| H | 7.48650800  | 2.10779500  | 0.60834700  |
| H | 3.24411200  | -4.72154000 | -4.10381700 |
| H | -2.11345700 | 3.82741500  | -3.94266000 |

### Dimer-B

|                                 |                     |
|---------------------------------|---------------------|
| M06-2X SCF energy:              | -2960.91977354 a.u. |
| M06-2X enthalpy:                | -2959.98336800 a.u. |
| M06-2X free energy:             | -2960.07602800 a.u. |
| M06-2X SCF energy in solution:  | -2961.60057944 a.u. |
| M06-2X enthalpy in solution:    | -2960.66417390 a.u. |
| M06-2X free energy in solution: | -2960.75683390 a.u. |

### Cartesian coordinates

| ATOM | X          | Y           | Z           |
|------|------------|-------------|-------------|
| Li   | 0.45049800 | 0.09840800  | 1.21903800  |
| N    | 1.83049800 | -1.31062800 | 1.43035200  |
| N    | 1.51103700 | 0.18858000  | -0.67035800 |
| P    | 2.53721600 | -0.84963900 | 0.07130900  |
| C    | 2.19045200 | -2.43965800 | 2.29309500  |
| C    | 1.88053900 | 1.51181400  | -0.92130500 |
| C    | 2.91178400 | -2.22982900 | -1.06762200 |
| C    | 4.12309700 | 0.03734500  | 0.29955400  |
| C    | 3.69809700 | -2.53065000 | 2.57772900  |
| C    | 1.72850900 | -3.77925400 | 1.69186600  |
| C    | 1.47261700 | -2.21256200 | 3.63001200  |
| C    | 1.63806300 | 2.51542000  | 0.08382500  |

|    |             |             |             |
|----|-------------|-------------|-------------|
| C  | 2.39242700  | 1.93180200  | -2.13472300 |
| C  | 4.14242500  | -2.88788700 | -1.13043200 |
| C  | 1.83746900  | -2.71565900 | -1.81912300 |
| C  | 4.33090000  | 0.69083600  | 1.51721000  |
| C  | 5.04352300  | 0.21653000  | -0.73827200 |
| H  | 3.91180300  | -3.37394200 | 3.24443100  |
| H  | 4.06544900  | -1.61562100 | 3.05203200  |
| H  | 4.26598500  | -2.68720200 | 1.65374600  |
| H  | 0.67790600  | -3.72487100 | 1.39063400  |
| H  | 1.84364300  | -4.59163100 | 2.42018100  |
| H  | 2.31615200  | -4.03793100 | 0.80530400  |
| H  | 1.68539400  | -3.02267200 | 4.33701400  |
| H  | 0.38826900  | -2.15637400 | 3.48617200  |
| H  | 1.80344500  | -1.26625800 | 4.07302700  |
| C  | 1.89526000  | 3.88442300  | -0.19425200 |
| N  | 1.12199000  | 2.10813700  | 1.28065400  |
| C  | 2.65790200  | 3.29434200  | -2.40298200 |
| H  | 2.57704700  | 1.17779000  | -2.89530800 |
| C  | 4.29457600  | -4.01435700 | -1.93790200 |
| H  | 4.98703800  | -2.52278500 | -0.55146500 |
| C  | 1.98618400  | -3.84286700 | -2.61920600 |
| H  | 0.87654200  | -2.20932900 | -1.75291800 |
| C  | 5.45532600  | 1.48996400  | 1.70547000  |
| H  | 3.59452500  | 0.56977800  | 2.30827400  |
| C  | 6.17047200  | 1.01153100  | -0.54871500 |
| H  | 4.87753000  | -0.26640000 | -1.69822000 |
| C  | 1.60495100  | 4.82453600  | 0.82465400  |
| C  | 2.41097600  | 4.25981100  | -1.46097500 |
| C  | 0.86985400  | 3.01270700  | 2.20110900  |
| H  | 3.05942400  | 3.57299700  | -3.37316000 |
| C  | 3.21835100  | -4.49347800 | -2.67996700 |
| H  | 5.25498100  | -4.51889900 | -1.98408800 |
| H  | 1.13940600  | -4.21451300 | -3.19026500 |
| C  | 6.37843900  | 1.64572600  | 0.67421900  |
| H  | 5.61093000  | 1.99153400  | 2.65586400  |
| H  | 6.88392000  | 1.14043500  | -1.35703200 |
| C  | 1.09850500  | 4.39576400  | 2.02316400  |
| H  | 1.78668600  | 5.88013200  | 0.63666000  |
| H  | 2.60568400  | 5.30946500  | -1.66264700 |
| H  | 0.44136300  | 2.64853600  | 3.13249200  |
| H  | 3.33843600  | -5.37399700 | -3.30388400 |
| H  | 7.25746900  | 2.26633900  | 0.82065700  |
| H  | 0.85671900  | 5.08782100  | 2.82214600  |
| Li | -0.45048700 | 0.09823400  | -1.21890700 |
| N  | -1.83071900 | -1.31052200 | -1.43035800 |
| N  | -1.51103200 | 0.18867700  | 0.67030100  |
| P  | -2.53737300 | -0.84941400 | -0.07132600 |
| C  | -2.19077600 | -2.43954600 | -2.29306300 |
| C  | -1.88036000 | 1.51196000  | 0.92125500  |
| C  | -4.12313800 | 0.03778200  | -0.29954300 |
| C  | -2.91209300 | -2.22954600 | 1.06762200  |
| C  | -3.69842700 | -2.53042700 | -2.57769800 |
| C  | -1.72895300 | -3.77914800 | -1.69176000 |
| C  | -1.47290400 | -2.21258200 | -3.62998300 |
| C  | -1.63773200 | 2.51553100  | -0.08387600 |
| C  | -2.39219000 | 1.93201800  | 2.13467200  |
| C  | -5.04355200 | 0.21702400  | 0.73828300  |
| C  | -4.33084100 | 0.69137800  | -1.51716100 |
| C  | -1.83782500 | -2.71546500 | 1.81913200  |
| C  | -4.14278700 | -2.88750700 | 1.13041300  |
| H  | -3.91220900 | -3.37376700 | -3.24431500 |
| H  | -4.06568800 | -1.61541300 | -3.05209700 |
| H  | -4.26633500 | -2.68683100 | -1.65370100 |
| H  | -0.67832700 | -3.72485600 | -1.39059000 |
| H  | -1.84421500 | -4.59156700 | -2.42000700 |
| H  | -2.31657800 | -4.03768800 | -0.80514500 |
| H  | -1.68574400 | -3.02270800 | -4.33694800 |

|   |             |             |             |
|---|-------------|-------------|-------------|
| H | -0.38855200 | -2.15648700 | -3.48612800 |
| H | -1.80363500 | -1.26626900 | -4.07304900 |
| C | -1.89471500 | 3.88457200  | 0.19420800  |
| N | -1.12172400 | 2.10816600  | -1.28070200 |
| C | -2.65746100 | 3.29459900  | 2.40293300  |
| H | -2.57692900 | 1.17803200  | 2.89525500  |
| C | -6.17040800 | 1.01216400  | 0.54875500  |
| H | -4.87762700 | -0.26597800 | 1.69820700  |
| C | -5.45517300 | 1.49064500  | -1.70539100 |
| H | -3.59445800 | 0.57029600  | -2.30821400 |
| C | -1.98663900 | -3.84266100 | 2.61921300  |
| H | -0.87686200 | -2.20920300 | 1.75293200  |
| C | -4.29503700 | -4.01396600 | 1.93788000  |
| H | -4.98736300 | -2.52233900 | 0.55143300  |
| C | -1.60425000 | 4.82464400  | -0.82469200 |
| C | -2.41037800 | 4.26003300  | 1.46093300  |
| C | -0.86944500 | 3.01269900  | -2.20115300 |
| H | -3.05894500 | 3.57331300  | 3.37310900  |
| C | -6.37828500 | 1.64644900  | -0.67414700 |
| H | -6.88385100 | 1.14110700  | 1.35707000  |
| H | -5.61070200 | 1.99229400  | -2.65575600 |
| C | -3.21886000 | -4.49317300 | 2.67995700  |
| H | -1.13989800 | -4.21437600 | 3.19028200  |
| H | -5.25548200 | -4.51843300 | 1.98405100  |
| C | -1.09787000 | 4.39579300  | -2.02320200 |
| H | -1.78581200 | 5.88026800  | -0.63669200 |
| H | -2.60492300 | 5.30971700  | 1.66260900  |
| H | -0.44101500 | 2.64846200  | -3.13253800 |
| H | -7.25724100 | 2.26717300  | -0.82056200 |
| H | -3.33902000 | -5.37368500 | 3.30386900  |
| H | -0.85596800 | 5.08781400  | -2.82217900 |

### Dimer-C

M06-2X SCF energy: -2960.92667495 a.u.  
M06-2X enthalpy: -2959.98969400 a.u.  
M06-2X free energy: -2960.08226800 a.u.  
M06-2X SCF energy in solution: -2961.60767953 a.u.  
M06-2X enthalpy in solution: -2960.67069858 a.u.  
M06-2X free energy in solution: -2960.76327258 a.u.

### Cartesian coordinates

| ATOM | X           | Y           | Z           |
|------|-------------|-------------|-------------|
| Li   | -0.82844900 | 1.53658300  | -0.28271700 |
| N    | -0.85409900 | -1.71264700 | -0.76744100 |
| N    | -2.42332100 | 0.39063500  | -0.04417900 |
| P    | -2.17016200 | -1.21869500 | -0.00209900 |
| C    | -0.71672000 | -1.82379700 | -2.23260100 |
| C    | -3.51535500 | 1.14076300  | 0.29475600  |
| C    | -3.70154800 | -2.08231900 | -0.52080600 |
| C    | -1.85267900 | -1.74925800 | 1.72075100  |
| C    | -3.41526000 | 2.56477300  | 0.03110400  |
| C    | -4.70779000 | 0.70338500  | 0.87492900  |
| C    | -3.96564600 | -3.38390700 | -0.08879100 |
| C    | -4.56320300 | -1.47814500 | -1.44293600 |
| C    | -1.02699400 | -2.85077700 | 1.97508900  |
| C    | -2.35448600 | -1.01215400 | 2.79834100  |
| C    | -4.50453200 | 3.43542900  | 0.30669500  |
| N    | -2.23802300 | 3.03068100  | -0.47640900 |
| C    | -5.77662100 | 1.58153100  | 1.14433800  |
| H    | -4.82665900 | -0.34792100 | 1.11629200  |
| C    | -5.06829800 | -4.07834600 | -0.57953800 |
| H    | -3.30374900 | -3.85874500 | 0.63124100  |
| C    | -5.66344900 | -2.17288000 | -1.93516500 |
| H    | -4.36614700 | -0.46129600 | -1.77312800 |
| C    | -0.68735600 | -3.19487300 | 3.28181100  |
| H    | -0.64671100 | -3.41818100 | 1.12890700  |
| C    | -2.02354100 | -1.36319300 | 4.10435700  |

|    |             |             |             |
|----|-------------|-------------|-------------|
| H  | -2.98477900 | -0.14650300 | 2.61701700  |
| C  | -4.33011000 | 4.80952100  | 0.01032200  |
| C  | -5.70074200 | 2.92260000  | 0.86501600  |
| C  | -2.11607900 | 4.31474700  | -0.73382200 |
| H  | -6.68103800 | 1.17235600  | 1.58585200  |
| C  | -5.91515200 | -3.47484600 | -1.50580200 |
| H  | -5.26536000 | -5.09069900 | -0.24017300 |
| H  | -6.32619300 | -1.69818500 | -2.65222500 |
| C  | -1.18370600 | -2.44810100 | 4.34761200  |
| H  | -0.03135800 | -4.04068300 | 3.46732600  |
| H  | -2.40775900 | -0.77630800 | 4.93309400  |
| C  | -3.14517900 | 5.25496200  | -0.51339300 |
| H  | -5.14881800 | 5.49716100  | 0.20784700  |
| H  | -6.52599600 | 3.59644200  | 1.07292900  |
| H  | -1.15788600 | 4.64309600  | -1.13153800 |
| H  | -6.77358500 | -4.01707900 | -1.89066700 |
| H  | -0.91416200 | -2.70930400 | 5.36640800  |
| H  | -2.98220600 | 6.30082000  | -0.74885200 |
| C  | 0.74741100  | -2.18990200 | -2.50563600 |
| H  | 0.98627300  | -3.15913800 | -2.05190400 |
| H  | 0.93945400  | -2.25366600 | -3.58281500 |
| C  | -1.58535600 | -2.95225200 | -2.81466000 |
| H  | -1.43451700 | -3.87076900 | -2.23732000 |
| H  | -2.65041100 | -2.70918700 | -2.79809500 |
| H  | -1.30255700 | -3.14571200 | -3.85599100 |
| C  | -1.04078900 | -0.50599400 | -2.95292800 |
| H  | -0.40411000 | 0.30441400  | -2.57559300 |
| H  | -0.86340300 | -0.59615500 | -4.03134700 |
| H  | -2.08593600 | -0.21625400 | -2.79878000 |
| Li | 0.82840600  | -1.53680400 | 0.28273000  |
| N  | 2.42313800  | -0.39066400 | 0.04388000  |
| N  | 2.23806600  | -3.03074800 | 0.47602300  |
| P  | 2.17010800  | 1.21870500  | 0.00208400  |
| C  | 3.51525100  | -1.14069200 | -0.29502300 |
| C  | 3.41528400  | -2.56470900 | -0.03142000 |
| C  | 2.11622900  | -4.31483700 | 0.73337900  |
| N  | 0.85403700  | 1.71261700  | 0.76742700  |
| C  | 1.85272500  | 1.74953700  | -1.72070700 |
| C  | 3.70154800  | 2.08206900  | 0.52098600  |
| C  | 4.70766100  | -0.70317600 | -0.87514200 |
| C  | 4.50465800  | -3.43524800 | -0.30696500 |
| C  | 3.14543700  | -5.25494300 | 0.51298700  |
| H  | 1.15803600  | -4.64328600 | 1.13101700  |
| C  | 0.71651400  | 1.82348100  | 2.23260100  |
| C  | 2.35435100  | 1.01243400  | -2.79838100 |
| C  | 1.02741000  | 2.85136000  | -1.97492100 |
| C  | 4.56316100  | 1.47761300  | 1.44297000  |
| C  | 3.96566700  | 3.38378000  | 0.08935400  |
| C  | 5.77660100  | -1.58119800 | -1.14450500 |
| H  | 4.82642800  | 0.34814900  | -1.11648600 |
| C  | 4.33035700  | -4.80937000 | -0.01064000 |
| C  | 5.70084700  | -2.92228500 | -0.86520600 |
| H  | 2.98252900  | -6.30082600 | 0.74837800  |
| C  | -0.74769600 | 2.18929100  | 2.50562500  |
| C  | 1.04069300  | 0.50554500  | 2.95267700  |
| C  | 1.58487200  | 2.95196700  | 2.81498100  |
| C  | 2.02352400  | 1.36374000  | -4.10435000 |
| H  | 2.98438300  | 0.14656800  | -2.61716100 |
| C  | 0.68788600  | 3.19573200  | -3.28160500 |
| H  | 0.64735300  | 3.41881300  | -1.12867400 |
| C  | 5.66337400  | 2.17220900  | 1.93545800  |
| H  | 4.36606300  | 0.46067800  | 1.77286900  |
| C  | 5.06828800  | 4.07808000  | 0.58036700  |
| H  | 3.30378100  | 3.85883200  | -0.63054600 |
| H  | 6.68099400  | -1.17191500 | -1.58596500 |
| H  | 5.14914700  | -5.49691600 | -0.20813500 |
| H  | 6.52618300  | -3.59604400 | -1.07306600 |

|   |             |             |             |
|---|-------------|-------------|-------------|
| H | -1.41786500 | 1.43507800  | 2.08151800  |
| H | -0.93980000 | 2.25269100  | 3.58281600  |
| H | -0.98667900 | 3.15864000  | 2.05220000  |
| H | 0.40437400  | -0.30491700 | 2.57484200  |
| H | 2.08597200  | 0.21613200  | 2.79880300  |
| H | 0.86290200  | 0.59530700  | 4.03106300  |
| H | 1.43415400  | 3.87048300  | 2.23760500  |
| H | 1.30167600  | 3.14537900  | 3.85621300  |
| H | 2.64994900  | 2.70899500  | 2.79880700  |
| C | 1.18401400  | 2.44893100  | -4.34748800 |
| H | 2.40759300  | 0.77685000  | -4.93315400 |
| H | 0.03213700  | 4.04175800  | -3.46700800 |
| C | 5.91509000  | 3.47430500  | 1.50649600  |
| H | 6.32608800  | 1.69731600  | 2.65241700  |
| H | 5.26538300  | 5.09052500  | 0.24129700  |
| H | 0.91456400  | 2.71033500  | -5.36625700 |
| H | 6.77350200  | 4.01642600  | 1.89156700  |
| H | 1.41771100  | -1.43564500 | -2.08180500 |

### Dimer-D

M06-2X SCF energy: -2960.91879996 a.u.  
M06-2X enthalpy: -2959.98153700 a.u.  
M06-2X free energy: -2960.07541600 a.u.  
M06-2X SCF energy in solution: -2961.60042130 a.u.  
M06-2X enthalpy in solution: -2960.66315834 a.u.  
M06-2X free energy in solution: -2960.75703734 a.u.

### Cartesian coordinates

| ATOM | X           | Y           | Z           |
|------|-------------|-------------|-------------|
| Li   | 0.26054400  | -1.68689800 | 1.22874000  |
| N    | 1.67870500  | 1.28192300  | 1.51330600  |
| N    | 1.99135600  | -1.14781900 | 0.38825900  |
| P    | 2.48429500  | 0.41782100  | 0.43275500  |
| C    | 2.02240800  | 1.44277900  | 2.93769900  |
| C    | 2.35851300  | -2.07823400 | -0.55711000 |
| C    | 4.30499500  | 0.47798800  | 0.64684100  |
| C    | 2.17859600  | 1.19807200  | -1.20182400 |
| C    | 1.64183800  | -3.33841400 | -0.53261100 |
| C    | 3.32625300  | -1.94109900 | -1.55176600 |
| C    | 4.99594400  | 1.69040100  | 0.53594500  |
| C    | 5.01116100  | -0.68161900 | 0.97664300  |
| C    | 0.84840500  | 1.43126600  | -1.56743400 |
| C    | 3.18677100  | 1.53865600  | -2.10925700 |
| C    | 1.92342900  | -4.36256800 | -1.47483400 |
| N    | 0.66146000  | -3.48004700 | 0.40124000  |
| C    | 3.59639900  | -2.96742000 | -2.48111800 |
| H    | 3.89729800  | -1.02273400 | -1.62196500 |
| C    | 6.37058200  | 1.74095000  | 0.74580800  |
| H    | 4.44890100  | 2.59823600  | 0.28981300  |
| C    | 6.38670200  | -0.63066200 | 1.19206500  |
| H    | 4.47353200  | -1.62169000 | 1.06960200  |
| C    | 0.52701800  | 2.01599800  | -2.78820900 |
| H    | 0.03912300  | 1.14258500  | -0.90416500 |
| C    | 2.86959300  | 2.12225500  | -3.33429800 |
| H    | 4.22890800  | 1.35140800  | -1.86816500 |
| C    | 1.15120700  | -5.54767100 | -1.39489300 |
| C    | 2.92295200  | -4.16255100 | -2.45880500 |
| C    | -0.04676400 | -4.58645400 | 0.43432600  |
| H    | 4.36255300  | -2.79381300 | -3.23156500 |
| C    | 7.06657900  | 0.57861600  | 1.07488200  |
| H    | 6.89790900  | 2.68591400  | 0.65779000  |
| H    | 6.92670600  | -1.53622900 | 1.45072100  |
| C    | 1.54245100  | 2.36843800  | -3.67392500 |
| H    | -0.51730000 | 2.18582400  | -3.03997600 |
| H    | 3.66605900  | 2.38264700  | -4.02504500 |
| C    | 0.16825000  | -5.66738700 | -0.44762100 |
| H    | 1.34729900  | -6.35011300 | -2.10192500 |



|    |             |             |             |   |             |             |            |
|----|-------------|-------------|-------------|---|-------------|-------------|------------|
| H  | 3.13220800  | -4.94861800 | -3.17778500 | H | -2.79990100 | -0.60795100 | 4.68627700 |
| H  | -0.83358800 | -4.63220000 | 1.18441400  | C | -3.01930700 | -2.77620900 | 2.97249000 |
| H  | 8.13887000  | 0.61770100  | 1.24138400  | H | -2.61912500 | -3.62100000 | 2.40204000 |
| H  | 1.29989700  | 2.82466700  | -4.62895200 | H | -3.15516300 | -3.09005100 | 4.01432700 |
| H  | -0.44429300 | -6.55883200 | -0.37151900 | H | -4.00201600 | -2.52254700 | 2.56885600 |
| Li | -0.25101900 | 1.66651400  | 1.26002100  |   |             |             |            |
| N  | -1.67065900 | -1.30002000 | 1.48968700  |   |             |             |            |
| N  | -1.98502100 | 1.15019800  | 0.41997500  |   |             |             |            |
| P  | -2.48088600 | -0.41478200 | 0.42858800  |   |             |             |            |
| C  | -2.05559400 | -1.58186900 | 2.88452500  |   |             |             |            |
| C  | -2.35367800 | 2.10296300  | -0.50358600 |   |             |             |            |
| C  | -2.17964000 | -1.14925800 | -1.23005700 |   |             |             |            |
| C  | -4.30268900 | -0.47195200 | 0.63681300  |   |             |             |            |
| C  | -1.62313900 | 3.35482500  | -0.46469200 |   |             |             |            |
| C  | -3.33531100 | 1.99606900  | -1.48797400 |   |             |             |            |
| C  | -0.85210800 | -1.40392800 | -1.59171200 |   |             |             |            |
| C  | -3.18567800 | -1.43168400 | -2.15970900 |   |             |             |            |
| C  | -4.99288300 | 0.67914000  | 1.02598000  |   |             |             |            |
| C  | -5.01262000 | -1.66421600 | 0.45340000  |   |             |             |            |
| C  | -1.90167500 | 4.39819800  | -1.38624300 |   |             |             |            |
| N  | -0.63069900 | 3.46851700  | 0.45960600  |   |             |             |            |
| C  | -3.60424800 | 3.04218800  | -2.39570300 |   |             |             |            |
| H  | -3.91948200 | 1.08709300  | -1.56714600 |   |             |             |            |
| C  | -0.53213400 | -1.95205900 | -2.82961400 |   |             |             |            |
| H  | -0.04249800 | -1.15770900 | -0.91221400 |   |             |             |            |
| C  | -2.87036900 | -1.97948400 | -3.40173800 |   |             |             |            |
| H  | -4.22569300 | -1.22799400 | -1.92302100 |   |             |             |            |
| C  | -6.36998000 | 0.63853800  | 1.23236100  |   |             |             |            |
| H  | -4.44089000 | 1.60432200  | 1.17049200  |   |             |             |            |
| C  | -6.38901800 | -1.70431900 | 0.65466100  |   |             |             |            |
| H  | -4.48032200 | -2.56530700 | 0.15601400  |   |             |             |            |
| C  | -1.11114900 | 5.57047000  | -1.29703700 |   |             |             |            |
| C  | -2.91537300 | 4.22800100  | -2.36133900 |   |             |             |            |
| C  | 0.09586600  | 4.56255000  | 0.50092300  |   |             |             |            |
| H  | -4.38180200 | 2.89119300  | -3.13929200 |   |             |             |            |
| C  | -1.54648300 | -2.24685600 | -3.73742600 |   |             |             |            |
| H  | 0.51027100  | -2.13839300 | -3.07758300 |   |             |             |            |
| H  | -3.66601100 | -2.19490200 | -4.10873800 |   |             |             |            |
| C  | -7.06824900 | -0.55144000 | 1.04566800  |   |             |             |            |
| H  | -6.89707000 | 1.53731100  | 1.53718800  |   |             |             |            |
| H  | -6.93073300 | -2.63411300 | 0.51054300  |   |             |             |            |
| C  | -0.11374800 | 5.66023000  | -0.36149800 |   |             |             |            |
| H  | -1.30433600 | 6.38701800  | -1.98857700 |   |             |             |            |
| H  | -3.12281800 | 5.02878100  | -3.06446200 |   |             |             |            |
| H  | 0.89369000  | 4.58209000  | 1.24043300  |   |             |             |            |
| H  | -1.30537800 | -2.67460800 | -4.70589700 |   |             |             |            |
| H  | -8.14192400 | -0.58250400 | 1.20475600  |   |             |             |            |
| H  | 0.51355200  | 6.54089900  | -0.28024700 |   |             |             |            |
| C  | 2.99307900  | 2.61568500  | 3.14652700  |   |             |             |            |
| H  | 3.98071600  | 2.38736800  | 2.73891800  |   |             |             |            |
| H  | 2.61028600  | 3.51022000  | 2.64397200  |   |             |             |            |
| H  | 3.11168700  | 2.83768300  | 4.21383000  |   |             |             |            |
| C  | 2.61898600  | 0.18673600  | 3.59144200  |   |             |             |            |
| H  | 2.70728600  | 0.32076300  | 4.67573300  |   |             |             |            |
| H  | 1.99591900  | -0.69178500 | 3.39838200  |   |             |             |            |
| H  | 3.61882000  | -0.02175400 | 3.19929400  |   |             |             |            |
| C  | 0.71098500  | 1.79704000  | 3.65407600  |   |             |             |            |
| H  | 0.86507600  | 1.96124500  | 4.72569400  |   |             |             |            |
| H  | 0.28063200  | 2.71945000  | 3.23768800  |   |             |             |            |
| H  | -0.01769600 | 0.98555500  | 3.54267100  |   |             |             |            |
| C  | -0.76437700 | -1.98375700 | 3.61268000  |   |             |             |            |
| H  | -0.04512400 | -1.15719500 | 3.60843700  |   |             |             |            |
| H  | -0.95760600 | -2.24974200 | 4.65714100  |   |             |             |            |
| H  | -0.30365400 | -2.85816100 | 3.13046500  |   |             |             |            |
| C  | -2.68210200 | -0.38652900 | 3.61922900  |   |             |             |            |
| H  | -2.06004900 | 0.50771600  | 3.51584700  |   |             |             |            |
| H  | -3.67228600 | -0.15393500 | 3.21686700  |   |             |             |            |
